# Supplementary material for: Algorithms for inference in SVARs identified with sign and zero restrictions
Source: Oxford University Press journal article supplement (doi:10.1093/ectj/utac009), 2022-02-16
Supplement: utac009_replication_package.zip [file utac009_replication_package.zip]

Archive with 33 entries (33 files):
- auxFunctions/analyticalBounds.m
- auxFunctions/approximateBounds.m
- auxFunctions/chebyCheck.m
- auxFunctions/chebyCheck_shockRank.m
- auxFunctions/chebyCheck2.m
- auxFunctions/checkEmptyIS_GKV.m
- auxFunctions/compareAlgorithmsIS.m
- auxFunctions/credibleRegion.m
- auxFunctions/drawq.m
- auxFunctions/drawqGibbs.m
- auxFunctions/drawqs.m
- auxFunctions/genBounds.m
- auxFunctions/genIRF.m
- auxFunctions/genVMA.m
- auxFunctions/highestPosteriorDensity.m
- auxFunctions/numericalBounds.m
- auxFunctions/posteriorSampler.m
- auxFunctions/posteriorSamplerAR.m
- auxFunctions/posteriorSamplerGibbs.m
- auxFunctions/posteriorSamplerShockRank.m
- auxFunctions/qcon.m
- auxFunctions/robustBayesActiveSet.m
- auxFunctions/robustBayesAR.m
- auxFunctions/robustBayesCheby.m
- checkEmptyISAlgorithms.m
- data_ACR.csv
- drawqAlgorithms.m
- mainfile_shockRank.m
- Qgibbs.m
- readme.pdf
- robustAlgorithms.m
- runall.m
- outputs/empty.txt
