# Supplementary material for: Algorithms for inference in SVARs identified with sign and zero restrictions
Source: Oxford University Press journal article supplement (doi:10.1093/ectj/utac009), 2022-02-16
Supplement: utac009_replication_package.zip [file utac009_replication_package.zip › checkEmptyISAlgorithms.m]

% Compare algorithms used to check whether the identified set is empty.

clear variables
close all
clc

oldFolder = pwd;
addpath('auxFunctions');
outputdir = 'outputs'; % Location to save output

%% Import data.
% These are obtained from the Matlab documentation accompanying Arias,
% Caldara and Rubio-Ramirez (2019), available on Jonas Arias' website:
% https://sites.google.com/site/jonasarias/.
% Variables are:
% 1: GDP (y)
% 2: GDP deflator (p)
% 3: Commodity prices (c)
% 4: Total reserves (tr)
% 5: Non-borrowed reserves (nbr)
% 6: Fed funds rate (r)
dataRaw = importdata('data_ACR.csv');

dates = datenum(dataRaw.textdata(2:end,1));

% Order variables in dataset so that zero restrictions apply to the first
% column of the orthonormal matrix.
data = dataRaw.data(:,[6, 1:5]); % (r y p c tr nbr)
data = [data(:,1) log(data(:,2:end))*100]; % Transform variables

% Declare any exogenous variables (other than the constant; leave empty 
% if none).
exog = [];

% Set variable names for plotting figures.
varnames = {'Federal Funds Rate','GDP','GDP Deflator',...
    'Commodity Prices','Total Reserves','Non-borrowed Reserves'};
% Set units for impulse responses. 0 = per cent, 1 = percentage points.
irfUnits = [1 0 0 0 0 0];

%% Options.
opt.p = 12; % No. of lags in VAR
opt.const = 0; % const = 1 if constant in VAR, = 0 otherwise
opt.cumIR = []; % Indices of variables for which cumulative impulse response should be used
opt.H = 60; % Terminal horizon for impulse responses
opt.phiDraws = 1000; % No. of draws from posterior of phi
opt.maxDraw = 100000; % Maximum no. of draws from set of orthonormal matrices

rng(19061987); % Set seed for random number generator

%% Input zero restrictions (common across specifications).
% Each row of eqRestr contains a vector (i,j,t) representing an equality 
% restriction, where t is the type of restriction:
% t = 1: the (ij)th element of A0 is zero
% t = 2: the (ij)th element of A0^(-1) is zero
% t = 3: the (ij)th element of the long-run cumulative impulse response 
% (LRCIR) is zero 
restr.eqRestr = ...
    [1 5 1; % A0_15 = 0 - fed funds rate does not respond to total reserves
     1 6 1]; % A0_16 = 0 - fed funds rate does not respond to non-borrowed reserves

%% Draw opt.Kdraws times from reduced-form posterior.
posteriorSampler;
 
%% Baseline set of sign restrictions.
% Each row of signRestr contains a vector (i,j,h,s,t) representing a sign 
% restriction, where t is the type of restriction:
% t = 1: the response of the ith variable with respect to the jth shock at 
% the hth horizon is nonnegative (s = 1) or nonpositive (s = -1).
% t = 2: the (ij)th element of A0 is nonnegative (s = 1) or nonpositive 
% (s = -1). 
restr.signRestr = ...
     [1 2 0 -1 2; % Response of fed funds rate to output is nonnegative
      1 3 0 -1 2; % Response of fed funds rate to prices is nonnegative
      1 1 0 1 1]; % Impact response of fed funds rate to MPS is nonnegative
  
% Check emptiness of identified set using three alternative algorithms.
compareAlgorithmsIS;
Empty1 = [Qempty1 Qempty2 Qempty3];
results1 = [mean(Qempty1) mean(Qempty2) mean(Qempty3);
                    AlgoRunTime1 AlgoRunTime2 AlgoRunTime3]
  
%% Add baseline sign restrictions from Uhlig (2005).
S1 = [1 1 0 1 1];
S1 = repmat(S1,[6,1]);
S1(:,3) = 0:5;
S2 = [3 1 0 -1 1];
S2 = repmat(S2,[6,1]);
S2(:,3) = 0:5;
S3 = [4 1 0 -1 1];
S3 = repmat(S3,[6,1]);
S3(:,3) = 0:5;
S4 = [6 1 0 -1 1];
S4 = repmat(S4,[6,1]);
S4(:,3) = 0:5;

restr.signRestr = ...
     [1 2 0 -1 2; % Response of fed funds rate to output is nonnegative
      1 3 0 -1 2; % Response of fed funds rate to prices is nonnegative
      S1; S2; S3; S4]; % Add extended sign restrictions from Uhlig (2005) 

% Check emptiness of identified set using three alternative algorithms.
compareAlgorithmsIS;
Empty2 = [Qempty1 Qempty2 Qempty3];
results2 = [mean(Qempty1) mean(Qempty2) mean(Qempty3);
                    AlgoRunTime1 AlgoRunTime2 AlgoRunTime3]   
   
%% Add extended sign restrictions from Uhlig (2005).
% Restrictions are as above but for one year after shock.
S1 = [1 1 0 1 1];
S1 = repmat(S1,[12,1]);
S1(:,3) = 0:11;
S2 = [3 1 0 -1 1];
S2 = repmat(S2,[12,1]);
S2(:,3) = 0:11;
S3 = [4 1 0 -1 1];
S3 = repmat(S3,[12,1]);
S3(:,3) = 0:11;
S4 = [6 1 0 -1 1];
S4 = repmat(S4,[12,1]);
S4(:,3) = 0:11;

restr.signRestr = ...
     [1 2 0 -1 2; % Response of fed funds rate to output is nonnegative
      1 3 0 -1 2; % Response of fed funds rate to prices is nonnegative
      S1; S2; S3; S4]; % Add extended sign restrictions from Uhlig (2005)
  
% Check emptiness of identified set using three alternative algorithms.
compareAlgorithmsIS;
Empty3 = [Qempty1 Qempty2 Qempty3];
results3 = [mean(Qempty1) mean(Qempty2) mean(Qempty3);
                    AlgoRunTime1 AlgoRunTime2 AlgoRunTime3] 
             
%% Add extended sign restrictions from Uhlig (2005).
% Restrictions are as above but for two years after shock.
S1 = [1 1 0 1 1];
S1 = repmat(S1,[24,1]);
S1(:,3) = 0:23;
S2 = [3 1 0 -1 1];
S2 = repmat(S2,[24,1]);
S2(:,3) = 0:23;
S3 = [4 1 0 -1 1];
S3 = repmat(S3,[24,1]);
S3(:,3) = 0:23;
S4 = [6 1 0 -1 1];
S4 = repmat(S4,[24,1]);
S4(:,3) = 0:23;

restr.signRestr = ...
     [1 2 0 -1 2; % Response of fed funds rate to output is nonnegative
      1 3 0 -1 2; % Response of fed funds rate to prices is nonnegative
      S1; S2; S3; S4]; % Add extended sign restrictions from Uhlig (2005)
  
% Check emptiness of identified set using three alternative algorithms.
compareAlgorithmsIS;
Empty4 = [Qempty1 Qempty2 Qempty3];
results4 = [mean(Qempty1) mean(Qempty2) mean(Qempty3);
                    AlgoRunTime1 AlgoRunTime2 AlgoRunTime3]  

TT = table(100*[results1(1,:); results2(1,:); results3(1,:); results4(1,:)],...
    [results1(2,:); results2(2,:); results3(2,:); results4(2,:)],...
    'VariableNames',{'Probability','Speed'})

cd(outputdir);
writetable(TT,'Results','FILETYPE','Spreadsheet','Sheet','EmptyIS');
                
save('checkEmptyISAlgorithms_results.mat');  
cd(oldFolder);             
