# Supplementary material for: Algorithms for inference in SVARs identified with sign and zero restrictions
Source: Oxford University Press journal article supplement (doi:10.1093/ectj/utac009), 2022-02-16
Supplement: utac009_replication_package.zip [file utac009_replication_package.zip › data_ACR.csv]

dates	monthly_GDP	monthly_GDPDEF	CPRINDEX	TRARR	BOGNONBR	FEDFUNDS	IP	CPIAUCSL
1/01/1965	3854.987973	18.58072017	58.515095	11.952	11.653	3.9	31.3203	31.28
1/02/1965	3865.303154	18.5585264	58.06227368	11.883	11.479	3.98	31.515	31.28
1/03/1965	3900.208873	18.56775344	56.82504348	11.884	11.472	4.04	31.9322	31.31
1/04/1965	3903.856817	18.59682772	56.9576	12.043	11.571	4.09	32.0713	31.38
1/05/1965	3924.774957	18.64749469	56.81948	11.912	11.417	4.1	32.3216	31.48
1/06/1965	3950.568226	18.71167759	55.80602727	12.005	11.467	4.04	32.572	31.61
1/07/1965	3987.416852	18.71039344	55.20009048	12.073	11.544	4.09	32.8779	31.58
1/08/1965	4007.614872	18.70830205	56.07686364	12.079	11.531	4.12	33.017	31.55
1/09/1965	4023.568276	18.75930451	56.29261905	12.071	11.517	4.01	33.1005	31.62
1/10/1965	4069.40406	18.79925256	55.68843333	12.118	11.63	4.08	33.4343	31.65
1/11/1965	4091.067788	18.85857824	55.89599048	12.087	11.655	4.1	33.5733	31.75
1/12/1965	4141.328153	18.90116921	57.39270952	12.316	11.872	4.32	33.9905	31.85
1/01/1966	4179.845288	18.90706714	58.67645238	12.295	11.875	4.42	34.3243	31.88
1/02/1966	4195.936344	18.98436283	58.97552632	12.193	11.711	4.6	34.5469	32.08
1/03/1966	4229.918368	19.03357003	58.93027826	12.164	11.604	4.65	35.0197	32.18
1/04/1966	4207.345208	19.08435562	59.293735	12.258	11.621	4.67	35.0754	32.28
1/05/1966	4222.932442	19.13217075	59.60281905	12.263	11.575	4.9	35.4092	32.35
1/06/1966	4227.02235	19.17647363	60.72224091	12.256	11.549	5.17	35.576	32.38
1/07/1966	4241.356586	19.22969109	62.06673	12.371	11.629	5.3	35.7707	32.45
1/08/1966	4237.642017	19.33280469	60.82950435	12.165	11.43	5.53	35.7986	32.65
1/09/1966	4268.601397	19.38850422	57.56702381	12.229	11.46	5.4	36.1323	32.75
1/10/1966	4290.825943	19.45069099	55.81125714	12.199	11.465	5.53	36.3827	32.85
1/11/1966	4269.182597	19.47778532	55.917595	12.205	11.598	5.76	36.1323	32.88
1/12/1966	4296.79146	19.51452369	57.10451429	12.223	11.69	5.4	36.2158	32.92
1/01/1967	4346.143586	19.52075461	56.66437143	12.334	11.924	4.94	36.3866	32.9
1/02/1967	4320.417621	19.58046756	56.72953684	12.28	11.916	5	35.9739	33
1/03/1967	4308.138793	19.58477783	56.82903636	12.438	12.237	4.53	35.7712	33
1/04/1967	4346.12308	19.62936837	56.0037	12.488	12.342	4.05	36.1085	33.1
1/05/1967	4315.699134	19.63088291	56.29704091	12.418	12.329	3.94	35.7935	33.1
1/06/1967	4324.277786	19.72274872	56.23620909	12.457	12.351	3.98	35.789	33.3
1/07/1967	4328.630296	19.78769564	54.96328	12.722	12.607	3.79	35.7075	33.4
1/08/1967	4399.898623	19.84789076	53.95403043	12.678	12.598	3.9	36.3916	33.5
1/09/1967	4369.771081	19.9114136	55.09223	12.846	12.758	3.99	36.3326	33.6
1/10/1967	4360.738609	19.9701883	55.69511818	13.088	12.959	3.88	36.6285	33.7
1/11/1967	4398.630424	20.08242056	56.7986381	13.131	12.999	4.13	37.1523	33.9
1/12/1967	4444.230967	20.14839114	58.32962	13.18	12.952	4.51	37.5525	34
1/01/1968	4462.164533	20.21796313	58.40521364	13.239	12.993	4.6	37.512	34.1
1/02/1968	4493.329016	20.28938303	57.86251053	13.188	12.815	4.71	37.6465	34.2
1/03/1968	4516.306451	20.36265384	57.80100952	13.186	12.527	5.05	37.764	34.3
1/04/1968	4525.977211	20.43373991	57.18799	13.117	12.432	5.76	37.8186	34.4
1/05/1968	4576.940871	20.49577974	57.18427273	13.13	12.389	6.11	38.2429	34.5
1/06/1968	4596.281918	20.58248035	56.185505	13.251	12.557	6.07	38.3833	34.7
1/07/1968	4593.449889	20.65205863	55.59439091	13.455	12.928	6.02	38.3245	34.9
1/08/1968	4600.671627	20.69946333	55.91307727	13.44	12.875	6.03	38.4314	35
1/09/1968	4603.778485	20.76647804	56.7048	13.435	12.931	5.78	38.577	35.1
1/10/1968	4590.754081	20.91104405	57.01293913	13.529	13.086	5.91	38.6536	35.3
1/11/1968	4631.580932	20.98822128	58.45791053	13.649	13.104	5.82	39.1535	35.4
1/12/1968	4637.064987	21.09773467	58.90497619	13.767	13.021	6.02	39.2772	35.6
1/01/1969	4661.881158	21.13986466	58.69569545	13.629	12.893	6.3	39.5148	35.7
1/02/1969	4689.158348	21.18836679	58.52513684	13.714	12.879	6.61	39.7677	35.8
1/03/1969	4723.760495	21.32276854	58.41716	13.653	12.751	6.79	40.0795	36.1
1/04/1969	4707.876981	21.41368253	59.0643381	13.471	12.468	7.41	39.932	36.3
1/05/1969	4687.879122	21.46923776	59.3408619	13.844	12.47	8.67	39.7811	36.4
1/06/1969	4724.343897	21.58107971	59.02255238	13.795	12.41	8.9	40.1698	36.6
1/07/1969	4737.359894	21.70742823	58.31499048	13.491	12.239	8.61	40.3818	36.8
1/08/1969	4739.186689	21.77803253	58.58395714	13.784	12.565	9.19	40.4746	36.9
1/09/1969	4731.753417	21.88453924	59.11137619	13.822	12.743	9.15	40.4655	37.1
1/10/1969	4728.770203	21.97708957	59.82186087	13.904	12.754	9	40.4774	37.3
1/11/1969	4699.45477	22.06763058	59.96976842	14.172	12.969	8.85	40.0958	37.5
1/12/1969	4718.275027	22.16827984	59.13506667	14.168	13.049	8.97	39.9882	37.7
1/01/1970	4684.059958	22.26692221	59.530235	14.087	13.128	8.98	39.2477	37.9
1/02/1970	4713.418504	22.38293916	58.57626316	14.099	13.019	8.98	39.2219	38.1
1/03/1970	4723.821538	22.49613863	58.01008571	14.071	13.173	7.76	39.171	38.3
1/04/1970	4712.503985	22.61863969	58.30132727	14.209	13.364	8.1	39.0702	38.5
1/05/1970	4715.639454	22.68388348	57.862965	14.007	13.04	7.94	39.0247	38.6
1/06/1970	4718.056561	22.77947683	57.68474091	14.078	13.197	7.6	38.8985	38.8
1/07/1970	4753.492836	22.82185451	57.81719545	14.159	12.799	7.21	38.994	38.9
1/08/1970	4766.077239	22.86864139	59.87896667	14.282	13.445	6.61	38.9245	39
1/09/1970	4752.029925	22.94950411	60.54900476	14.447	13.847	6.29	38.6561	39.2
1/10/1970	4677.226174	23.05093196	59.73541364	14.48	14.017	6.2	37.8829	39.4
1/11/1970	4666.473942	23.17055022	59.62954211	14.47	14.055	5.6	37.6534	39.6
1/12/1970	4781.199884	23.32451782	59.45456364	14.558	14.225	4.9	38.5182	39.8
1/01/1971	4835.892055	23.45490273	59.301285	14.604	14.24	4.14	38.8144	39.9
1/02/1971	4837.158996	23.52338964	58.95728421	14.819	14.488	3.72	38.7405	39.9
1/03/1971	4829.848949	23.62970763	57.68328696	14.798	14.479	3.71	38.6985	40
1/04/1971	4839.330483	23.72400253	58.0555619	14.759	14.606	4.15	38.9158	40.1
1/05/1971	4859.010158	23.84850938	58.441235	14.982	14.698	4.63	39.1133	40.3
1/06/1971	4887.359358	23.96548809	58.83259545	15.057	14.564	4.91	39.2773	40.5
1/07/1971	4897.102581	24.03719744	57.70869524	15.125	14.302	5.31	39.1633	40.6
1/08/1971	4874.563156	24.08514869	57.70867727	15.19	14.38	5.56	38.936	40.7
1/09/1971	4928.334263	24.14165387	56.83071429	15.423	14.928	5.55	39.5688	40.8
1/10/1971	4924.90987	24.19459758	56.66999524	15.211	14.854	5.2	39.865	40.9
1/11/1971	4904.383522	24.27889395	56.56894762	15.247	14.864	4.91	40.0342	41
1/12/1971	4913.606608	24.39050847	58.34531429	15.23	15.104	4.14	40.4964	41.1
1/01/1972	4977.040047	24.55368194	60.25071429	15.369	15.347	3.5	41.4709	41.2
1/02/1972	4998.085451	24.70451049	60.805525	15.363	15.331	3.29	41.8616	41.4
1/03/1972	5032.074502	24.73380757	62.32475909	15.48	15.382	3.83	42.1645	41.4
1/04/1972	5104.309119	24.76692518	63.730315	15.651	15.534	4.17	42.6064	41.5
1/05/1972	5115.741633	24.80924117	65.23852273	15.739	15.628	4.27	42.582	41.6
1/06/1972	5134.849247	24.86883364	64.16097727	15.909	15.809	4.46	42.7051	41.7
1/07/1972	5130.027443	24.94974362	65.415525	15.835	15.597	4.55	42.6924	41.8
1/08/1972	5178.068273	25.03119713	67.70868696	16.01	15.623	4.8	43.2568	41.9
1/09/1972	5188.104284	25.16305925	68.510495	16	15.459	4.87	43.5838	42.1
1/10/1972	5215.522543	25.26984646	69.59157273	16.193	15.637	5.04	44.1699	42.2
1/11/1972	5247.108243	25.38752955	71.53691	16.441	15.833	5.06	44.6846	42.4
1/12/1972	5290.969214	25.44062399	76.53101579	16.645	15.595	5.33	45.2006	42.5
1/01/1973	5322.57194	25.52885348	78.35678571	16.708	15.548	5.94	45.498	42.7
1/02/1973	5403.058124	25.65204001	79.49096842	16.714	15.12	6.58	46.1773	43
1/03/1973	5415.869936	25.80210651	83.01037727	16.923	15.099	7.09	46.1937	43.4
1/04/1973	5425.713516	25.92779787	85.680775	16.731	15.02	7.12	46.1272	43.7
1/05/1973	5457.258751	26.03148019	93.24921364	16.672	14.829	7.84	46.4199	43.9
1/06/1973	5441.527732	26.19672194	98.08725238	16.746	14.895	8.49	46.4535	44.2
1/07/1973	5425.373861	26.27255119	105.8837667	16.988	15.035	10.4	46.648	44.2
1/08/1973	5389.576799	26.6248903	127.4853	16.796	14.631	10.5	46.5669	45
1/09/1973	5420.74934	26.74955851	132.1447263	16.735	14.883	10.78	46.9866	45.2
1/10/1973	5451.128116	26.94447354	128.9511591	16.924	15.448	10.01	47.2997	45.6
1/11/1973	5475.3765	27.06463772	124.0918714	16.978	15.585	10.03	47.548	45.9
1/12/1973	5460.695384	27.22188874	133.9347474	17.021	15.723	9.95	47.4375	46.3
1/01/1974	5422.714145	27.38391503	140.5263318	17.222	16.171	9.65	47.1083	46.8
1/02/1974	5409.755903	27.57947555	145.0923778	17.125	15.933	8.97	46.9634	47.3
1/03/1974	5418.529952	27.81260942	140.794881	17.131	15.817	9.35	46.9733	47.8
1/04/1974	5414.676462	27.97552009	139.0070429	17.298	15.561	10.51	46.83	48.1
1/05/1974	5451.518968	28.24790443	137.7817227	17.423	14.833	11.31	47.1848	48.6
1/06/1974	5427.70457	28.52057549	142.658375	17.367	14.361	11.93	47.1292	49
1/07/1974	5397.594872	28.71276581	149.2470773	17.486	14.185	12.92	47.1505	49.3
1/08/1974	5348.736845	29.04939738	151.1879182	17.391	14.055	12.01	46.6882	49.9
1/09/1974	5389.768282	29.43883681	150.615155	17.385	14.102	11.34	46.7161	50.6
1/10/1974	5442.80154	29.6654955	160.9692565	17.349	15.536	10.06	46.536	51
1/11/1974	5355.775165	29.92608108	176.5075579	17.453	16.201	9.45	45.0062	51.5
1/12/1974	5273.023295	30.17742341	158.6875857	17.55	16.823	8.53	43.4204	51.9
1/01/1975	5311.24762	30.40880767	145.5508636	17.273	16.874	7.13	42.8246	52.3
1/02/1975	5280.189897	30.61584486	138.3492263	17.271	17.123	6.24	41.8301	52.6
1/03/1975	5285.762483	30.77834747	125.51565	17.439	17.333	5.54	41.3862	52.8
1/04/1975	5320.485242	30.92598922	123.7787818	17.498	17.387	5.49	41.4258	53
1/05/1975	5324.823514	31.02087317	112.8759476	17.353	17.288	5.22	41.3326	53.1
1/06/1975	5354.291244	31.23013761	109.2291524	17.715	17.488	5.55	41.6042	53.5
1/07/1975	5382.325816	31.47022115	120.3680682	17.632	17.331	6.1	42.0025	54
1/08/1975	5417.349141	31.57828823	130.959281	17.66	17.449	6.14	42.4426	54.2
1/09/1975	5464.525044	31.78749062	128.2042571	17.834	17.438	6.24	42.9708	54.6
1/10/1975	5476.327608	31.95228939	123.9283435	17.587	17.397	5.82	43.1611	54.9
1/11/1975	5477.811165	32.15845159	118.4740737	17.849	17.789	5.22	43.2561	55.3
1/12/1975	5529.061227	32.30625902	119.6732143	17.822	17.692	5.2	43.7944	55.6
1/01/1976	5591.57741	32.39975195	122.8205619	17.616	17.537	4.87	44.4309	55.8
1/02/1976	5632.388128	32.46862469	125.4898105	17.806	17.725	4.77	44.8644	55.9
1/03/1976	5631.534463	32.55062336	127.410613	17.875	17.821	4.84	44.916	56
1/04/1976	5654.568638	32.64575201	130.728019	17.719	17.675	4.82	45.1733	56.1
1/05/1976	5668.796143	32.81239966	137.60354	17.94	17.826	5.29	45.3729	56.4
1/06/1976	5659.635219	32.95084833	145.2255	17.946	17.82	5.48	45.3841	56.7
1/07/1976	5676.416826	33.0570597	147.2141714	17.846	17.714	5.31	45.6491	57
1/08/1976	5697.474687	33.21031716	138.1319455	18.053	17.953	5.29	45.9698	57.3
1/09/1976	5695.508486	33.41062314	138.6823333	18.009	17.948	5.25	46.1015	57.6
1/10/1976	5678.66045	33.65394597	141.2733143	18.077	17.983	5.02	46.1172	57.9
1/11/1976	5738.585284	33.81063471	144.984515	18.34	18.268	4.95	46.7939	58.1
1/12/1976	5780.254266	33.98041932	147.928719	18.388	18.335	4.65	47.2798	58.4
1/01/1977	5742.095946	34.13363855	155.3295619	18.421	18.353	4.61	47.023	58.7
1/02/1977	5805.221643	34.40161903	162.9702895	18.299	18.227	4.68	47.7335	59.3
1/03/1977	5850.282411	34.54174243	177.6077087	18.405	18.301	4.69	48.3415	59.6
1/04/1977	5869.678686	34.73729844	175.88932	18.479	18.406	4.73	48.7789	60
1/05/1977	5908.578014	34.82656776	172.2813238	18.585	18.379	5.35	49.2046	60.2
1/06/1977	5960.743301	34.95913379	164.8402682	18.471	18.208	5.39	49.5627	60.5
1/07/1977	6002.268386	35.08109736	154.9478526	18.748	18.425	5.42	49.6389	60.8
1/08/1977	6016.168695	35.26169008	146.900913	18.919	17.858	5.9	49.6517	61.1
1/09/1977	6034.362918	35.46721256	150.8941905	18.873	18.247	6.14	49.8872	61.3
1/10/1977	6016.744275	35.78124357	149.9689952	18.963	17.658	6.47	49.9859	61.6
1/11/1977	6011.286937	36.07069726	149.8941667	19.012	18.15	6.51	50.0357	62
1/12/1977	6026.568788	36.25605917	142.4293857	18.99	18.42	6.56	50.1135	62.3
1/01/1978	5973.431421	36.42090141	141.97	19.29	18.806	6.7	49.4201	62.7
1/02/1978	6015.97988	36.54923589	142.5981211	19.561	19.155	6.78	49.6618	63
1/03/1978	6128.188699	36.7488627	146.6054182	19.286	18.958	6.79	50.6053	63.4
1/04/1978	6244.606091	36.99151296	147.51714	19.408	18.851	6.89	51.6639	63.9
1/05/1978	6266.460074	37.26699003	146.9752773	19.655	18.443	7.36	51.8472	64.5
1/06/1978	6310.933835	37.46749702	146.9354091	19.868	18.774	7.6	52.2056	65
1/07/1978	6316.033714	37.64289416	144.43296	20.118	18.801	7.81	52.1834	65.5
1/08/1978	6339.709824	37.83006301	148.1885304	19.912	18.772	8.04	52.3807	65.9
1/09/1978	6350.156462	38.12204284	154.9899	19.994	18.934	8.45	52.5124	66.5
1/10/1978	6387.52379	38.46758278	157.8372364	20.109	18.832	8.96	52.9384	67.1
1/11/1978	6423.581582	38.67510883	161.017425	19.872	19.169	9.76	53.3363	67.5
1/12/1978	6449.794628	38.84030839	157.53476	19.753	18.885	10.03	53.6296	67.9
1/01/1979	6406.522079	39.05886543	154.548	19.821	18.818	10.07	53.2837	68.5
1/02/1979	6436.329398	39.34582092	155.5056474	19.396	18.423	10.06	53.5675	69.2
1/03/1979	6456.148524	39.65131365	155.1853682	19.429	18.439	10.09	53.7364	69.9
1/04/1979	6395.328353	39.96322804	155.873635	19.504	18.587	10.01	53.1571	70.6
1/05/1979	6452.756894	40.31227993	159.6946	19.553	17.788	10.24	53.5566	71.4
1/06/1979	6474.314753	40.63649204	170.0236048	19.808	18.39	10.29	53.5534	72.2
1/07/1979	6497.187223	40.91970643	167.4059762	19.992	18.822	10.47	53.4808	73
1/08/1979	6475.562582	41.16807428	162.9479826	20.008	18.923	10.94	53.1195	73.7
1/09/1979	6488.550195	41.40721929	166.3172842	20.007	18.667	11.43	53.1786	74.4
1/10/1979	6514.240246	41.71930976	166.7535261	20.375	18.353	13.77	53.4617	75.2
1/11/1979	6500.828562	41.98286706	166.5635619	20.398	18.492	13.18	53.409	76
1/12/1979	6496.631192	42.25582317	170.7156526	20.72	19.248	13.78	53.4536	76.9
1/01/1980	6514.097349	42.55975618	173.7600455	20.693	19.452	13.82	53.7071	78
1/02/1980	6525.52813	42.83423567	183.014195	20.682	19.027	14.13	53.7262	79
1/03/1980	6535.074522	43.18300815	172.2797619	20.703	17.879	17.19	53.5481	80.1
1/04/1980	6462.895716	43.4187354	169.3389762	20.629	18.174	17.61	52.4571	80.9
1/05/1980	6369.55098	43.76967388	176.9067571	20.44	19.421	10.98	51.1904	81.7
1/06/1980	6345.353304	44.21159072	173.7496714	20.575	20.196	9.47	50.5575	82.5
1/07/1980	6346.531073	44.40758813	175.3013364	20.796	20.401	9.03	50.166	82.6
1/08/1980	6372.590436	44.80069482	181.6676381	21.011	20.352	9.61	50.353	83.2
1/09/1980	6429.578491	45.21571705	186.9347429	21.232	19.921	10.87	51.1727	83.9
1/10/1980	6426.882399	45.61631657	194.4956217	21.147	19.837	12.81	51.8129	84.7
1/11/1980	6506.275655	46.06062882	192.6292222	22.15	20.091	15.85	52.7175	85.6
1/12/1980	6570.441946	46.46105461	178.619	22.015	20.325	18.9	53.0142	86.4
1/01/1981	6620.377299	46.83111023	177.6932095	21.673	20.278	19.08	52.7119	87.2
1/02/1981	6630.917535	47.22524941	173.0020474	21.84	20.536	15.93	52.4633	88
1/03/1981	6655.805166	47.53164036	170.9831545	22.072	21.072	14.7	52.7501	88.6
1/04/1981	6578.012614	47.81226791	167.4866333	22.187	20.849	15.72	52.5233	89.1
1/05/1981	6581.528527	48.08160559	159.977605	22.442	20.219	18.52	52.8211	89.7
1/06/1981	6602.358859	48.34912649	155.2024273	22.326	20.289	19.1	53.0699	90.5
1/07/1981	6655.530096	48.63501676	156.58605	22.329	20.65	19.04	53.4044	91.5
1/08/1981	6673.46574	48.88648992	150.9618143	22.356	20.936	17.82	53.3959	92.2
1/09/1981	6659.704163	49.31649332	142.894419	22.487	21.031	15.87	53.0761	93.1
1/10/1981	6642.383112	49.57057206	145.1683818	22.296	21.115	15.08	52.6972	93.4
1/11/1981	6588.435616	49.87833959	146.367335	22.338	21.675	13.31	52.0996	93.8
1/12/1981	6524.481272	50.14008835	146.7072364	22.443	21.807	12.37	51.5219	94.1
1/01/1982	6397.997494	50.39761555	148.45545	22.669	21.152	13.22	50.4933	94.4
1/02/1982	6519.506755	50.6269775	150.1424053	22.551	20.762	14.78	51.4979	94.7
1/03/1982	6507.495751	50.65840694	145.3694478	22.452	20.898	14.68	51.1159	94.7
1/04/1982	6508.6695	50.7627993	147.6495429	22.337	20.769	14.94	50.6623	95
1/05/1982	6509.725024	51.15021745	146.702205	22.402	21.285	14.45	50.3505	95.9
1/06/1982	6512.205476	51.59698325	142.4395227	22.368	21.164	14.15	50.1943	97
1/07/1982	6498.910254	51.78498528	145.6833857	22.182	21.49	12.59	50.0395	97.5
1/08/1982	6470.882004	51.90901102	144.6284864	22.348	21.833	10.12	49.6075	97.7
1/09/1982	6490.607742	52.0270037	149.0802857	22.686	21.752	10.31	49.4584	97.7
1/10/1982	6493.252236	52.39371262	146.7096429	22.889	22.412	9.71	49.011	98.1
1/11/1982	6505.701834	52.51697461	150.46317	23.354	22.733	9.2	48.8232	98
1/12/1982	6480.34593	52.53831277	156.1443	23.6	22.966	8.95	48.4682	97.7
1/01/1983	6579.305537	52.82696359	164.6541	23.226	22.697	8.68	49.3992	97.9
1/02/1983	6548.746818	52.93658966	171.2282684	23.901	23.319	8.51	49.089	98
1/03/1983	6606.547644	52.95744675	160.1139913	24.414	23.621	8.77	49.4906	98.1
1/04/1983	6694.307459	53.14830772	164.48562	24.9	23.89	8.8	50.0805	98.8
1/05/1983	6736.283649	53.26905886	169.4694857	24.86	23.907	8.63	50.4295	99.2
1/06/1983	6754.308892	53.37763342	165.9682227	25.277	23.641	8.98	50.7333	99.4
1/07/1983	6805.243923	53.66136011	166.668255	25.356	23.903	9.37	51.5016	99.8
1/08/1983	6847.470876	53.8390358	170.7304696	25.376	23.83	9.56	52.0679	100.1
1/09/1983	6927.285201	53.96860409	167.5295143	25.435	23.994	9.45	52.8472	100.4
1/10/1983	6983.093681	54.10800372	162.2723143	25.454	24.61	9.48	53.2874	100.8
1/11/1983	7001.183906	54.22171412	158.0569714	25.396	24.491	9.34	53.4759	101.1
1/12/1983	7020.222414	54.32728215	162.4940571	25.367	24.593	9.47	53.7593	101.4
1/01/1984	7116.515249	54.61203203	159.4760143	25.451	24.736	9.56	54.8216	102.1
1/02/1984	7135.377955	54.82422461	161.267535	25.829	25.262	9.59	55.0698	102.6
1/03/1984	7169.906796	54.95174336	166.7696727	25.763	24.812	9.91	55.3384	102.9
1/04/1984	7227.208631	55.14417091	165.53511	25.691	24.457	10.29	55.6911	103.3
1/05/1984	7269.567454	55.25701738	163.9159364	25.882	22.894	10.32	55.9506	103.5
1/06/1984	7301.223915	55.36981171	161.0337857	26.094	22.794	11.06	56.1549	103.7
1/07/1984	7325.369537	55.57016091	152.8761	25.981	20.057	11.23	56.3326	104.1
1/08/1984	7341.284458	55.7159803	152.6590565	26.04	18.023	11.64	56.3847	104.4
1/09/1984	7345.846005	55.82885879	147.7032632	26.09	18.848	11.3	56.2832	104.7
1/10/1984	7357.597122	55.97077105	145.1837739	26.259	20.242	9.99	56.1943	105.1
1/11/1984	7402.076744	56.05441264	147.4506429	26.518	21.901	9.43	56.4108	105.3
1/12/1984	7428.326133	56.21181631	144.177345	26.913	23.727	8.38	56.4759	105.5
1/01/1985	7435.287382	56.42683341	142.0826727	27.077	25.683	8.35	56.3801	105.7
1/02/1985	7474.118891	56.75871898	140.7978	27.596	26.307	8.5	56.5796	106.3
1/03/1985	7499.093726	56.98644761	138.2215714	27.591	25.998	8.58	56.6645	106.8
1/04/1985	7496.536148	56.99414251	140.2150286	27.871	26.548	8.27	56.5122	107
1/05/1985	7535.029354	57.04121588	137.7270818	28.156	26.822	7.97	56.5982	107.2
1/06/1985	7582.134498	57.18964161	138.578895	28.849	27.644	7.53	56.6317	107.5
1/07/1985	7598.921383	57.30738762	136.0837636	29.142	28.035	7.88	56.2637	107.7
1/08/1985	7661.708781	57.40876395	134.1474136	29.653	28.58	7.9	56.496	107.9
1/09/1985	7704.969837	57.50184843	131.624415	30.031	28.742	7.92	56.7412	108.1
1/10/1985	7673.896533	57.58538907	135.4946478	30.49	29.303	7.99	56.508	108.5
1/11/1985	7695.629927	57.73622808	140.5404	30.916	29.176	8.05	56.6984	109
1/12/1985	7768.27354	57.89238285	143.7879857	31.569	30.251	8.27	57.2954	109.5
1/01/1986	7808.882826	58.04437562	153.8890364	31.564	30.794	8.14	57.5555	109.9
1/02/1986	7782.670456	58.05127717	149.3006211	31.659	30.775	7.86	57.1707	109.7
1/03/1986	7760.746718	57.96434721	152.49546	32.091	31.33	7.48	56.7784	109.1
1/04/1986	7792.668949	58.03025872	150.6874909	32.518	31.625	6.99	56.8228	108.7
1/05/1986	7831.631631	58.26965577	149.1950571	33.266	32.39	6.85	56.938	109
1/06/1986	7835.099421	58.45608551	147.0210857	33.947	33.144	6.92	56.7427	109.4
1/07/1986	7894.554399	58.4426115	147.1594091	34.657	33.917	6.56	57.0569	109.5
1/08/1986	7896.239572	58.42403332	137.7468857	35.192	34.319	6.17	56.9807	109.6
1/09/1986	7905.006029	58.59435518	143.5840714	35.622	34.613	5.89	57.0954	110
1/10/1986	7915.632336	58.70023439	142.9862087	36.262	35.421	5.85	57.3542	110.2
1/11/1986	7930.645487	58.79846447	140.4905211	37.271	36.519	6.04	57.623	110.4
1/12/1986	7972.222176	58.94030114	136.5639955	38.841	38.014	6.91	58.1006	110.8
1/01/1987	7943.337141	59.12574102	135.0258	39.244	38.664	6.43	57.9173	111.4
1/02/1987	8018.859853	59.23488587	134.2162421	39.007	38.45	6.1	58.663	111.8
1/03/1987	8022.803006	59.35937312	133.8628909	38.828	38.301	6.13	58.7602	112.2
1/04/1987	8059.218289	59.51674731	140.6568429	39.534	38.541	6.37	59.1416	112.7
1/05/1987	8089.854538	59.60752755	150.817095	39.812	38.777	6.85	59.517	113
1/06/1987	8105.027173	59.78672514	150.0275045	39.462	38.686	6.73	59.7996	113.5
1/07/1987	8129.924882	59.88316536	149.8801909	39.081	38.408	6.58	60.2152	113.8
1/08/1987	8168.911545	60.08277803	150.9773571	39.209	38.562	6.73	60.7146	114.3
1/09/1987	8175.163573	60.24405661	149.9433	39.118	38.178	7.22	60.8781	114.7
1/10/1987	8265.952048	60.39123307	148.4581091	39.827	38.884	7.29	61.7569	115
1/11/1987	8294.385998	60.59017955	150.036705	39.335	38.71	6.69	62.091	115.4
1/12/1987	8317.761954	60.71958739	154.8420545	38.913	38.136	6.77	62.394	115.6
1/01/1988	8308.72425	60.92235874	155.96802	39.465	38.383	6.83	62.4207	116
1/02/1988	8339.498415	61.04027234	151.24005	39.407	39.01	6.58	62.6908	116.2
1/03/1988	8369.677335	61.16636892	151.6818522	39.267	37.515	6.58	62.8421	116.5
1/04/1988	8434.281164	61.45023056	151.585785	39.622	36.629	6.87	63.1885	117.2
1/05/1988	8443.806499	61.59256907	154.7046429	39.958	37.381	7.09	63.1203	117.5
1/06/1988	8470.412337	61.85620037	163.3979455	40.278	37.195	7.51	63.2843	118
1/07/1988	8473.379971	62.12929135	159.058575	40.515	37.075	7.75	63.3155	118.5
1/08/1988	8512.0698	62.37287393	154.4038826	40.47	37.23	8.01	63.5859	119
1/09/1988	8509.450229	62.57483473	155.7960857	40.343	37.504	8.19	63.405	119.5
1/10/1988	8571.014548	62.68127232	156.4228714	40.423	38.124	8.3	63.7184	119.9
1/11/1988	8604.465858	62.8391583	158.3723143	40.548	37.687	8.35	63.8175	120.3
1/12/1988	8657.219594	63.05656938	162.9381	40.454	38.738	8.76	64.1273	120.7
1/01/1989	8692.284163	63.35106071	164.8518857	40.422	38.773	9.12	64.3162	121.2
1/02/1989	8679.751214	63.538511	158.9284895	40.339	38.852	9.36	64.026	121.6
1/03/1989	8721.064623	63.76042829	161.0643273	39.845	38.032	9.85	64.166	122.2
1/04/1989	8758.862627	64.03032011	160.184115	39.533	37.244	9.84	64.222	123.1
1/05/1989	8746.12522	64.20875198	159.3040091	39.301	37.581	9.81	63.7707	123.7
1/06/1989	8793.312153	64.38192791	154.8335455	39.085	37.595	9.53	63.8022	124.1
1/07/1989	8779.886825	64.61321879	152.62416	39.438	38.744	9.24	63.236	124.5
1/08/1989	8869.232169	64.64705521	151.1283913	39.398	38.723	8.99	63.8059	124.5
1/09/1989	8845.381006	64.75572599	151.48224	39.674	38.981	9.02	63.576	124.8
1/10/1989	8818.588663	64.97961891	152.2159364	40.163	39.608	8.84	63.5346	125.4
1/11/1989	8837.545927	65.15146655	152.3133857	40.17	39.821	8.55	63.7465	125.9
1/12/1989	8894.46541	65.23491453	149.64417	40.487	40.222	8.45	64.1419	126.3
1/01/1990	8876.772805	65.601964	149.2563682	40.731	40.292	8.23	63.7117	127.5
1/02/1990	8963.747543	65.80458368	151.5260842	40.744	39.296	8.24	64.3504	128
1/03/1990	9000.779653	66.11645232	155.2409182	40.65	38.527	8.28	64.6721	128.6
1/04/1990	8979.02251	66.35428584	157.60017	40.845	39.237	8.26	64.5975	128.9
1/05/1990	8977.560717	66.45582184	158.3727955	40.751	39.419	8.18	64.7028	129.1
1/06/1990	8988.516773	66.74989232	153.9792429	40.667	39.786	8.29	64.9174	129.9
1/07/1990	8967.521796	66.86183792	155.0133	40.576	39.818	8.15	64.8436	130.5
1/08/1990	8985.110436	67.15106056	154.8261	40.873	39.947	8.13	65.043	131.6
1/09/1990	8999.067767	67.32910152	151.5581053	41.09	40.466	8.2	65.1372	132.5
1/10/1990	8955.622024	67.50778106	148.6724087	40.809	40.398	8.11	64.6442	133.4
1/11/1990	8891.711668	67.53839579	144.3562714	40.971	40.741	7.81	63.8853	133.7
1/12/1990	8874.866308	67.81982315	144.487395	41.767	41.441	7.31	63.4658	134.2
1/01/1991	8883.423939	68.15945166	143.7249273	42.294	41.76	6.91	63.1915	134.7
1/02/1991	8864.95158	68.32956634	143.9149263	42.072	41.82	6.25	62.7585	134.8
1/03/1991	8848.424482	68.398982	146.57643	41.805	41.564	6.12	62.4265	134.8
1/04/1991	8873.426346	68.54291337	147.5391273	41.862	41.631	5.91	62.5503	135.1
1/05/1991	8941.036719	68.77099964	150.1668409	42.411	42.108	5.78	63.1756	135.6
1/06/1991	8988.736935	68.97808699	152.1936	42.712	42.372	5.9	63.742	136
1/07/1991	8966.702555	69.10219988	145.5102409	42.985	42.378	5.82	63.8029	136.2
1/08/1991	8954.335635	69.27619061	138.1812545	43.393	42.629	5.66	63.8503	136.6
1/09/1991	9010.861809	69.42860951	137.53935	43.558	42.913	5.45	64.4151	137
1/10/1991	9002.619906	69.45973292	134.1893348	44.007	43.746	5.21	64.2992	137.2
1/11/1991	9017.029738	69.66663012	133.391115	44.615	44.507	4.81	64.2209	137.8
1/12/1991	9029.550356	69.80263696	132.5337	45.516	45.324	4.43	63.9602	138.2
1/01/1992	9048.988079	69.80577111	133.3268182	46.374	46.141	4.03	63.596	138.3
1/02/1992	9128.811822	69.90064943	138.8026421	47.602	47.525	4.06	64.0409	138.6
1/03/1992	9191.200099	70.11957946	137.9504455	48.274	48.183	3.98	64.5973	139.1
1/04/1992	9215.001091	70.27119552	136.1166857	49.042	48.952	3.73	65.0756	139.4
1/05/1992	9225.208989	70.38322825	137.370285	49.337	49.182	3.82	65.2831	139.7
1/06/1992	9230.289921	70.50957623	139.1002364	49.271	49.041	3.76	65.2957	140.1
1/07/1992	9315.777617	70.63268565	137.9031136	49.756	49.471	3.25	65.8801	140.5
1/08/1992	9296.57975	70.71974448	136.2816	50.479	50.229	3.3	65.5581	140.8
1/09/1992	9327.242633	70.81656988	138.0382714	51.395	51.107	3.22	65.715	141.1
1/10/1992	9391.089314	71.06062451	133.23375	52.767	52.625	3.1	66.2013	141.7
1/11/1992	9419.493205	71.23499776	136.723275	53.75	53.646	3.09	66.4879	142.1
1/12/1992	9408.91748	71.30737773	142.1066045	54.422	54.298	2.92	66.5431	142.3
1/01/1993	9410.622453	71.51091095	143.48412	54.971	54.805	3.02	66.8264	142.8
1/02/1993	9431.409552	71.62064627	144.8971105	54.687	54.641	3.03	67.1172	143.1
1/03/1993	9430.267995	71.68644278	146.5012957	54.971	54.879	3.07	67.0479	143.3
1/04/1993	9477.62653	71.8754312	142.8915429	55.359	55.285	2.96	67.2498	143.8
1/05/1993	9470.202458	72.07178491	141.113115	56.655	56.534	3	67.0325	144.2
1/06/1993	9492.471012	72.17578389	140.6441045	57.086	56.905	3.04	67.1532	144.3
1/07/1993	9516.174832	72.33436993	144.7189714	57.73	57.486	3.06	67.3586	144.5
1/08/1993	9511.136521	72.52764239	145.0560682	58.184	57.832	3.03	67.2888	144.8
1/09/1993	9551.588647	72.56298768	141.5566286	58.871	58.444	3.09	67.6092	145
1/10/1993	9615.398101	72.73009256	138.9792857	59.595	59.309	2.99	68.1214	145.6
1/11/1993	9651.503977	72.84956619	142.5138	60.304	60.215	3.02	68.4089	146
1/12/1993	9693.597923	72.97934126	146.6734286	60.567	60.485	2.96	68.7737	146.3
1/01/1994	9720.941001	73.00354036	151.1562	60.896	60.822	3.05	69.0299	146.3
1/02/1994	9721.758906	73.20826567	153.2385947	60.516	60.446	3.25	69.0418	146.7
1/03/1994	9801.900093	73.40619397	154.1566565	60.299	60.244	3.34	69.7582	147.1
1/04/1994	9843.768767	73.45986161	153.5089263	60.504	60.38	3.56	70.125	147.2
1/05/1994	9880.468131	73.56909819	160.6644	59.972	59.772	4.01	70.4978	147.5
1/06/1994	9919.963102	73.6840402	163.0527955	60.048	59.715	4.25	70.948	147.9
1/07/1994	9915.832314	73.79256468	171.041715	60.321	59.863	4.26	71.0595	148.4
1/08/1994	9945.555349	73.98976794	168.9342652	59.96	59.491	4.47	71.4749	149
1/09/1994	9957.712337	74.12466738	175.7551714	59.8	59.313	4.73	71.7333	149.3
1/10/1994	10009.55439	74.21481159	169.7943	59.374	58.994	4.76	72.3479	149.4
1/11/1994	10041.85887	74.39295355	169.3920429	59.412	59.163	5.29	72.8018	149.8
1/12/1994	10106.08673	74.52023486	168.9981429	59.466	59.257	5.45	73.5563	150.1
1/01/1995	10099.3438	74.69233904	172.1788714	59.404	59.268	5.53	73.6891	150.5
1/02/1995	10076.22679	74.82880744	172.0029316	58.653	58.593	5.92	73.5889	150.9
1/03/1995	10085.1294	74.88785352	177.4111696	58.21	58.141	5.98	73.6895	151.2
1/04/1995	10090.92102	75.04467993	176.9871316	57.974	57.863	6.05	73.676	151.8
1/05/1995	10120.76764	75.11602147	175.7531455	57.641	57.492	6.01	73.8858	152.1
1/06/1995	10154.61135	75.2352986	178.5170045	57.377	57.104	6	74.1391	152.4
1/07/1995	10126.49821	75.34457116	179.18901	57.818	57.446	5.85	73.8447	152.6
1/08/1995	10233.36185	75.50917951	177.5820913	57.538	57.257	5.74	74.7803	152.9
1/09/1995	10266.53995	75.61324934	175.18644	57.31	57.033	5.8	75.0755	153.1
1/10/1995	10255.28367	75.80232591	171.0438955	56.72	56.474	5.76	74.9925	153.5
1/11/1995	10276.70673	75.87371902	170.9208429	56.306	56.102	5.8	75.1822	153.7
1/12/1995	10311.6096	75.90695507	169.264485	56.484	56.226	5.6	75.4725	153.9
1/01/1996	10261.69667	76.1971558	168.1954773	55.884	55.846	5.56	74.9823	154.7
1/02/1996	10395.6924	76.25776931	171.843165	54.622	54.588	5.22	76.153	155
1/03/1996	10388.71093	76.36107488	172.0897286	55.295	55.274	5.31	76.0724	155.5
1/04/1996	10466.13793	76.50970711	177.1251857	55.179	55.088	5.22	76.7608	156.1
1/05/1996	10527.39952	76.5597983	183.3831409	54.041	53.914	5.24	77.3269	156.4
1/06/1996	10594.66255	76.61649458	176.53077	54.145	53.759	5.27	77.9694	156.7
1/07/1996	10572.74326	76.71613884	174.9256364	53.377	53.01	5.4	77.8351	157
1/08/1996	10622.52644	76.73354774	177.7596955	52.162	51.828	5.22	78.3005	157.2
1/09/1996	10685.1303	76.88431342	172.32345	51.313	50.945	5.3	78.8378	157.7
1/10/1996	10686.62403	76.99461339	164.6881826	50.038	49.751	5.24	78.7843	158.2
1/11/1996	10751.64826	77.17277234	164.64942	49.78	49.566	5.31	79.4683	158.7
1/12/1996	10779.02771	77.33661427	162.9252857	50.185	50.03	5.29	79.9829	159.1
1/01/1997	10741.49399	77.51037178	163.7459571	49.684	49.639	5.25	80.0837	159.4
1/02/1997	10826.72907	77.68525084	169.5176053	48.716	48.673	5.19	81.0483	159.7
1/03/1997	10894.47694	77.74537737	178.40862	47.851	47.694	5.39	81.6195	159.8
1/04/1997	10927.27882	77.81874552	178.8334364	47.354	47.093	5.51	81.6408	159.9
1/05/1997	10993.71024	77.81591812	188.5187571	46.657	46.414	5.5	82.1311	159.9
1/06/1997	11031.61094	77.93633636	184.1451857	46.938	46.571	5.56	82.5332	160.2
1/07/1997	11075.19578	78.00882677	173.6742429	46.756	46.347	5.52	83.1538	160.4
1/08/1997	11133.08243	78.13237474	173.4786857	46.913	46.316	5.54	84.0293	160.8
1/09/1997	11163.72178	78.26379849	170.4873857	46.248	45.81	5.54	84.7873	161.2
1/10/1997	11176.55754	78.34111644	160.869913	45.96	45.69	5.5	85.5125	161.5
1/11/1997	11219.12818	78.40792748	158.5005158	46.411	46.258	5.52	86.2601	161.7
1/12/1997	11235.21428	78.43595608	155.9844	46.876	46.551	5.5	86.5262	161.8
1/01/1998	11297.93115	78.54107629	152.917245	46.659	46.449	5.56	86.9662	162
1/02/1998	11322.47989	78.52483048	155.0286947	45.743	45.685	5.51	87.0687	162
1/03/1998	11343.18895	78.50309324	151.2698318	45.854	45.813	5.49	87.1414	162
1/04/1998	11389.66774	78.55538919	150.2714571	46.131	46.059	5.45	87.4497	162.2
1/05/1998	11470.56255	78.71804239	148.15242	45.532	45.379	5.49	88.0124	162.6
1/06/1998	11432.76971	78.78756842	145.8862364	45.417	45.166	5.56	87.4571	162.8
1/07/1998	11428.527	78.93513556	145.1791714	44.893	44.636	5.54	87.1484	163.2
1/08/1998	11654.24941	79.00405845	143.8286571	44.956	44.686	5.55	88.936	163.4
1/09/1998	11659.02359	79.003806	138.9714857	44.85	44.599	5.51	88.778	163.5
1/10/1998	11756.48158	79.1095833	133.0195286	44.888	44.714	5.07	89.4857	163.9
1/11/1998	11759.49742	79.20259031	134.43183	44.816	44.732	4.83	89.4358	164.1
1/12/1998	11796.121	79.37182639	130.4964818	45.174	45.058	4.68	89.7761	164.4
1/01/1999	11830.95408	79.59974674	132.0826	45.03	44.824	4.63	90.1893	164.7
1/02/1999	11875.62882	79.64625926	132.1176316	44.926	44.81	4.76	90.6683	164.7
1/03/1999	11887.51711	79.625994	133.1821174	44.471	44.406	4.81	90.831	164.8
1/04/1999	11909.65831	79.97153625	133.2501857	43.661	43.495	4.74	91.0632	165.9
1/05/1999	11989.76825	79.89745241	140.14962	44.006	43.879	4.74	91.7311	166
1/06/1999	11988.07344	79.80401134	142.2263143	43.064	42.919	4.76	91.5818	166
1/07/1999	12076.75773	80.04566231	140.1832714	41.992	41.683	4.99	92.1587	166.7
1/08/1999	12141.37668	80.13506799	138.7226455	42.302	41.958	5.07	92.5363	167.1
1/09/1999	12121.16559	80.3592697	132.4874571	41.958	41.62	5.22	92.1699	167.8
1/10/1999	12274.84629	80.45001357	131.3319429	41.572	41.291	5.2	93.3786	168.1
1/11/1999	12320.65692	80.52590729	134.4435857	41.771	41.535	5.42	93.824	168.4
1/12/1999	12374.39679	80.66507914	135.6463588	42.149	41.829	5.3	94.5441	168.8
1/01/2000	12325.27259	80.8715647	136.1553632	42.533	42.159	5.45	94.5458	169.3
1/02/2000	12342.93361	81.10910395	138.856185	41.445	41.338	5.73	94.8185	170
1/03/2000	12409.09381	81.50833135	140.7311609	40.727	40.548	5.85	95.1983	171
1/04/2000	12546.83744	81.44389324	141.0703412	40.484	40.18	6.02	95.8921	170.9
1/05/2000	12603.59632	81.53279705	140.4952714	40.684	40.322	6.27	96.0691	171.2
1/06/2000	12627.06625	81.89230971	136.2353318	40.171	39.692	6.53	96.1568	172.2
1/07/2000	12602.60073	82.05334007	133.4329941	40.091	39.521	6.54	96.0239	172.7
1/08/2000	12576.02192	82.02539186	129.8681526	39.813	39.234	6.5	95.7182	172.7
1/09/2000	12644.47735	82.37726807	132.8600813	39.555	39.078	6.52	96.1105	173.6
1/10/2000	12654.20583	82.50241585	132.61599	39.369	38.951	6.51	95.8225	173.9
1/11/2000	12691.6674	82.5841279	130.6590188	39.384	39.1	6.51	95.8391	174.2
1/12/2000	12692.02677	82.69245624	132.71635	38.685	38.475	6.4	95.5791	174.6
1/01/2001	12644.95639	83.00399904	129.6568	37.885	37.812	5.98	94.9499	175.6
1/02/2001	12623.87122	83.12953003	129.1797	38.585	38.534	5.49	94.369	176
1/03/2001	12661.07239	83.20247093	127.4247	38.406	38.348	5.31	94.1259	176.1
1/04/2001	12721.48066	83.35499906	126.1934471	38.375	38.325	4.8	93.9061	176.4
1/05/2001	12715.44427	83.77411228	132.9011357	38.628	38.415	4.21	93.2803	177.3
1/06/2001	12693.97507	83.96788866	128.5574063	38.834	38.604	3.97	92.7057	177.7
1/07/2001	12655.93947	83.86083881	124.35813	39.475	39.192	3.77	92.1721	177.4
1/08/2001	12671.4637	83.84915184	124.8307412	39.961	39.778	3.65	92.0023	177.4
1/09/2001	12682.89683	84.20900935	121.29078	57.917	54.532	3.07	91.6795	178.1
1/10/2001	12697.4393	84.18692857	112.7401364	45.461	45.334	2.49	91.2682	177.6
1/11/2001	12690.56989	84.23910712	112.2651563	40.952	40.868	2.09	90.7894	177.5
1/12/2001	12727.89081	84.25496432	113.6705143	41.384	41.317	1.82	90.8311	177.4
1/01/2002	12804.25128	84.40971409	116.87	41.68	41.63	1.73	91.3471	177.7
1/02/2002	12803.01944	84.48994648	119.34585	41.813	41.783	1.74	91.3672	178
1/03/2002	12859.62928	84.59133943	124.244055	41.053	40.974	1.73	92.1054	178.5
1/04/2002	12853.29173	84.8162487	123.67685	40.538	40.468	1.75	92.479	179.3
1/05/2002	12868.99173	84.82110204	124.9348182	39.508	39.396	1.75	92.8824	179.5
1/06/2002	12956.71654	84.79864926	124.48815	39.12	38.978	1.75	93.7637	179.6
1/07/2002	12940.55663	84.98467721	126.9655789	39.277	39.085	1.73	93.5461	180
1/08/2002	12951.94563	85.22055211	129.6832727	39.862	39.529	1.74	93.5765	180.5
1/09/2002	12974.89774	85.36477068	137.335	38.875	38.646	1.75	93.7116	180.8
1/10/2002	12947.96629	85.55884001	137.7317391	39.115	38.972	1.75	93.4006	181.2
1/11/2002	13001.17669	85.67007107	136.7747368	39.774	39.502	1.34	93.8758	181.5
1/12/2002	12942.85703	85.72408892	143.5533333	40.275	40.195	1.24	93.4191	181.8
1/01/2003	12987.93884	85.86921668	151.1478947	40.722	40.695	1.24	93.9571	182.6
1/02/2003	13039.28544	86.23588741	157.1589474	41.206	41.18	1.26	94.2558	183.6
1/03/2003	13066.37572	86.43189591	151.157619	41.169	41.148	1.25	94.0416	183.9
1/04/2003	13075.02714	86.43287493	144.9332	40.568	40.538	1.26	93.3666	183.2
1/05/2003	13151.04353	86.434216	150.3012381	40.909	40.853	1.26	93.3852	182.9
1/06/2003	13230.22933	86.49790907	150.2564211	42.256	42.094	1.22	93.5219	183.1
1/07/2003	13327.95289	86.65083156	146.7942273	43.083	42.952	1.01	93.9144	183.7
1/08/2003	13348.45134	86.93312569	150.8645	45.775	45.447	1.03	93.7371	184.5
1/09/2003	13440.79577	87.21804275	150.9395238	44.141	43.96	1.01	94.3262	185.1
1/10/2003	13466.93286	87.18622684	159.3553913	43.402	43.295	1.01	94.4442	184.9
1/11/2003	13561.80314	87.30381067	162.9833333	42.856	42.788	1	95.2224	185
1/12/2003	13557.364	87.54796249	171.7508095	42.542	42.496	0.98	95.1545	185.5
1/01/2004	13576.65572	87.88901932	179.0274444	42.981	42.875	1	95.3434	186.3
1/02/2004	13643.99286	88.10683231	179.6394737	42.993	42.951	1.01	95.9228	186.7
1/03/2004	13598.85143	88.32814837	188.9642727	44.868	44.816	1	95.4538	187.1
1/04/2004	13656.42101	88.50311231	190.086	45.613	45.527	1	95.8653	187.4
1/05/2004	13762.2735	88.88036446	192.697	45.422	45.311	1	96.6472	188.2
1/06/2004	13699.9055	89.24152323	186.9757143	45.869	45.689	1.03	95.8588	188.9
1/07/2004	13814.04124	89.36291709	184.6595238	46.126	45.882	1.26	96.5901	189.1
1/08/2004	13837.00416	89.36076812	185.3595455	45.536	45.284	1.43	96.6687	189.2
1/09/2004	13841.3546	89.54231479	187.4452381	46.477	46.142	1.61	96.745	189.8
1/10/2004	13920.95904	89.76479484	202.659	46.289	46.11	1.76	97.6604	190.8
1/11/2004	13927.86662	90.12420313	200.827	46.003	45.82	1.93	97.8427	191.7
1/12/2004	14002.37434	90.25800204	193.1895238	46.425	46.362	2.16	98.5495	191.7
1/01/2005	14057.59851	90.4196899	193.9535	47.449	47.387	2.28	99.002	191.6
1/02/2005	14131.75115	90.92113513	198.2989474	45.901	45.859	2.5	99.6741	192.4
1/03/2005	14107.95034	91.30817496	216.7922727	46.816	46.767	2.63	99.5181	193.1
1/04/2005	14110.89763	91.60909194	213.9061905	46.132	46.001	2.79	99.6518	193.7
1/05/2005	14152.04228	91.54276066	205.6133333	45.447	45.307	3	99.8158	193.6
1/06/2005	14255.16009	91.4771474	217.1914286	46.103	45.854	3.04	100.2232	193.7
1/07/2005	14311.5636	91.79232693	220.2575	46.411	45.986	3.26	99.8997	194.9
1/08/2005	14382.44002	92.16439491	232.0982609	45.357	44.994	3.5	100.1025	196.1
1/09/2005	14181.39637	93.24027816	244.8882353	46.4	46.068	3.62	98.2644	198.8
1/10/2005	14278.45093	93.31369503	250.3409524	45.486	45.202	3.78	99.4949	199.1
1/11/2005	14379.68877	92.97090305	241.3978947	45.1	44.974	4	100.5129	198.1
1/12/2005	14462.0603	93.01540192	255.2869	44.963	44.795	4.16	101.1118	198.1
1/01/2006	14518.83998	93.64789176	251.1426316	44.377	44.267	4.29	101.2313	199.3
1/02/2006	14547.32397	93.84666738	247.8811111	44.136	44.083	4.49	101.2755	199.4
1/03/2006	14572.13605	94.00144085	248.7486522	43.878	43.709	4.59	101.4651	199.7
1/04/2006	14604.55532	94.40998562	266.7205263	44.553	44.305	4.79	101.9012	200.7
1/05/2006	14570.98253	94.63172138	279.2918182	44.937	44.762	4.94	101.7589	201.3
1/06/2006	14593.26215	94.71929299	270.1145455	45.535	45.282	4.99	102.1304	201.8
1/07/2006	14569.11368	95.07421884	278.925	44.564	44.214	5.24	102.0989	202.9
1/08/2006	14613.74408	95.44184226	282.4904348	43.167	42.798	5.25	102.4526	203.8
1/09/2006	14624.94224	95.2249389	265.9299	43.321	42.918	5.25	102.2753	202.8
1/10/2006	14676.66466	95.20264232	276.5988636	42.795	42.566	5.25	102.2299	201.9
1/11/2006	14686.08562	95.44978884	291.262381	42.921	42.762	5.25	102.1419	202
1/12/2006	14787.94971	96.08756883	292.3515789	43.124	42.933	5.24	103.2191	203.1
1/01/2007	14675.62016	96.3525882	282.3626	41.998	41.787	5.25	102.7129	203.437
1/02/2007	14752.93763	96.64117423	294.3183684	42.178	42.149	5.26	103.7659	204.226
1/03/2007	14749.44221	96.96823758	297.4967727	41.943	41.889	5.26	103.9538	205.288
1/04/2007	14824.7855	96.99623111	309.6479	42.328	42.248	5.25	104.7077	205.904
1/05/2007	14835.22287	97.22008459	311.1468182	43.439	43.336	5.25	104.7507	206.755
1/06/2007	14856.09164	97.3656843	314.933619	44.195	44.007	5.25	104.7581	207.234
