# Supplementary material for: Algorithms for inference in SVARs identified with sign and zero restrictions
Source: Oxford University Press journal article supplement (doi:10.1093/ectj/utac009), 2022-02-16
Supplement: utac009_replication_package.zip [file utac009_replication_package.zip › drawqAlgorithms.m]

% Compare algorithms used to draw from a uniform distribution over the set
% of values of q_1 satisfying the identifying restrictions.

clear variables
close all
clc

oldFolder = pwd;
addpath('auxFunctions');
outputdir = 'outputs';
cd(outputdir);
load('checkEmptyISAlgorithms_results.mat');
cd(oldFolder);

opt.L = 100000; % Target number of draws of q
opt.burn = 3; % Drop first burn draws from Gibbs sampler
opt.f = 2; % Keep every f-th draw from Gibbs sampler (f = thinning parameter)
rng(19061987);

%% Baseline set of sign restrictions.
% Each row of signRestr contains a vector (i,j,h,s,t) representing a sign 
% restriction, where t is the type of restriction:
% t = 1: the response of the ith variable with respect to the jth shock at 
% the hth horizon is nonnegative (s = 1) or nonpositive (s = -1).
% t = 2: the (ij)th element of A0 is nonnegative (s = 1) or nonpositive 
% (s = -1). 
restr.signRestr = ...
     [1 2 0 -1 2; % Response of fed funds rate to output is nonnegative
      1 3 0 -1 2; % Response of fed funds rate to prices is nonnegative
      1 1 0 1 1]; % Impact response of fed funds rate to MPS is nonnegative

%% Obtain draws at q at random value of phi with nonempty identified set.

kk = randi([1,opt.phiDraws]); % Index of draw of phi
if Empty1(kk,1) == 1
    error('Identified set empty at draw of phi!');
end
phi.Sigmatr = Sigmatr(:,:,kk);
phi.Sigmatrinv = phi.Sigmatr\eye(n);
phi.B = B(:,kk);
[phi.vma,~] = genVMA(phi,opt);

% Obtain draws of q using rejection sampling.
tic
qAR = drawqs(restr,phi,opt);
toc

% Obtain draws of q using Gibbs sampler.
tic
[c0,K,restr.F,restr.S,restr.Sbar,Qempty(phiDraw)] = ...
    chebyCheck(restr,phi,opt);
qGibbs = drawqGibbs(restr.Sbar,size(restr.F,1),K,c0,opt);
toc
 
% Compute impact impulse response of output using draws of q.
irfAR = phi.Sigmatr(2,:)*qAR;
irfGibbs = phi.Sigmatr(2,:)*qGibbs;

% Plot histograms of impulse responses.
figure;
histogram(irfAR,'Normalization','pdf',...
    'FaceColor',[0 0 204]./255,'EdgeColor',[0 0 204]./255);
hold on;
histogram(irfGibbs,'Normalization','pdf',...
    'FaceColor',[255 0 127]./255,'EdgeColor',[255 0 127]./255);
xlabel('$$\eta_{2,1,0}$$','interpreter','LaTeX');
% title('Draws of $$\eta_{2,1,0}$$ Under Two Algorithms',...
%     'interpreter','LaTeX');
Ax = gca;
Ax.FontSize = 14;
legend('Rejection sampler','Gibbs sampler','Location','NorthWest');
legend boxoff;
cd(outputdir);
print('irfHistogram','-depsc');
print('irfHistogram','-dpng');
cd(oldFolder);

% Plot autocorrelation function of impulse-response draws obtained using
% Gibbs sampler. A thinning parameter of f = 2 seems adequate to eliminate
% a significant first-order autocorrelation.
figure;
autocorr(irfGibbs);

% Conduct two-sample Kolmogorov-Smirnov test for equality of distributions
% to check if impulse-response draws obtained using the two algorithms have
% the same distribution.
[~,pval,ksstat] = kstest2(irfAR,irfGibbs)

%% Determine appropriate length of burn-in sample.

% Obtain L draws of q using L parallel Gibbs samplers, dropping the first
% burn draws.
L = opt.L;
opt.L = 1; 
opt.f = 1;

qGibbs2 = zeros(n,opt.L);

for kk = 1:L
    
    qGibbs2(:,kk) = drawqGibbs(restr.Sbar,size(restr.F,1),K,c0,opt);
    
end
irfGibbs2 = phi.Sigmatr(2,:)*qGibbs2;

figure;
h1 = histogram(irfAR,'Normalization','pdf',...
    'FaceColor',[0 0 204]./255,'EdgeColor',[0 0 204]./255);
hold on;
h2 = histogram(irfGibbs2,'Normalization','pdf',...
    'FaceColor',[255 0 127]./255,'EdgeColor',[255 0 127]./255);
xlabel('Output response');
title('Draws of $$\eta_{2,1,0}$$ Under Two Algorithms',...
    'interpreter','LaTeX');
Ax = gca;
Ax.FontSize = 14;
legend('Accept-reject','Gibbs','Location','Northwest');
legend boxoff;

[~,pval,ksstat] = kstest2(irfAR,irfGibbs2)

%% Compare speed of algorithms using 1,000 draws from posterior of phi.

opt.burn = 3; % Drop first burn draws from Gibbs sampler
opt.L = 1;
opt.f = 1;

%% Identifying restrictions (1)

% Obtain 1,000 draws from the joint posterior of (phi,Q) such that the 
% identified set is nonempty using the accept-reject algorithm.
rng(19061987);
posteriorSamplerAR;
runTimeAR1 = runTime;

% Obtain 1,000 draws from the joint posterior of (phi,Q) such that the 
% identified set is nonempty using the Gibbs sampler.
rng(19061987);
posteriorSamplerGibbs;
runTimeGibbs1 = runTime;

%% Add baseline sign restrictions from Uhlig (2005).
S1 = [1 1 0 1 1];
S1 = repmat(S1,[6,1]);
S1(:,3) = 0:5;
S2 = [3 1 0 -1 1];
S2 = repmat(S2,[6,1]);
S2(:,3) = 0:5;
S3 = [4 1 0 -1 1];
S3 = repmat(S3,[6,1]);
S3(:,3) = 0:5;
S4 = [6 1 0 -1 1];
S4 = repmat(S4,[6,1]);
S4(:,3) = 0:5;

restr.signRestr = ...
     [1 2 0 -1 2; % Response of fed funds rate to output is nonnegative
      1 3 0 -1 2; % Response of fed funds rate to prices is nonnegative
      S1; S2; S3; S4]; % Add extended sign restrictions from Uhlig (2005) 

% Obtain 1,000 draws from the joint posterior of (phi,Q) such that the 
% identified set is nonempty using the accept-reject algorithm.
rng(19061987);
posteriorSamplerAR;
runTimeAR2 = runTime;

% Obtain 1,000 draws from the joint posterior of (phi,Q) such that the 
% identified set is nonempty using the Gibbs sampler.
rng(19061987);
posteriorSamplerGibbs;
runTimeGibbs2 = runTime;

%% Add extended sign restrictions from Uhlig (2005).
% Restrictions are as above but for one year after shock.
S1 = [1 1 0 1 1];
S1 = repmat(S1,[12,1]);
S1(:,3) = 0:11;
S2 = [3 1 0 -1 1];
S2 = repmat(S2,[12,1]);
S2(:,3) = 0:11;
S3 = [4 1 0 -1 1];
S3 = repmat(S3,[12,1]);
S3(:,3) = 0:11;
S4 = [6 1 0 -1 1];
S4 = repmat(S4,[12,1]);
S4(:,3) = 0:11;

restr.signRestr = ...
     [1 2 0 -1 2; % Response of fed funds rate to output is nonnegative
      1 3 0 -1 2; % Response of fed funds rate to prices is nonnegative
      S1; S2; S3; S4]; % Add extended sign restrictions from Uhlig (2005)

% Obtain 1,000 draws from the joint posterior of (phi,Q) such that the 
% identified set is nonempty using the accept-reject algorithm.
rng(19061987);
posteriorSamplerAR;
runTimeAR3 = runTime;

% Obtain 1,000 draws from the joint posterior of (phi,Q) such that the 
% identified set is nonempty using the Gibbs sampler.
rng(19061987);
posteriorSamplerGibbs;
runTimeGibbs3 = runTime;

%% Add extended sign restrictions from Uhlig (2005).
% Restrictions are as above but for two years after shock.
S1 = [1 1 0 1 1];
S1 = repmat(S1,[24,1]);
S1(:,3) = 0:23;
S2 = [3 1 0 -1 1];
S2 = repmat(S2,[24,1]);
S2(:,3) = 0:23;
S3 = [4 1 0 -1 1];
S3 = repmat(S3,[24,1]);
S3(:,3) = 0:23;
S4 = [6 1 0 -1 1];
S4 = repmat(S4,[24,1]);
S4(:,3) = 0:23;

restr.signRestr = ...
     [1 2 0 -1 2; % Response of fed funds rate to output is nonnegative
      1 3 0 -1 2; % Response of fed funds rate to prices is nonnegative
      S1; S2; S3; S4]; % Add extended sign restrictions from Uhlig (2005)

% Obtain 1,000 draws from the joint posterior of (phi,Q) such that the 
% identified set is nonempty using the accept-reject algorithm.
rng(19061987);
posteriorSamplerAR;
runTimeAR4 = runTime;

% Obtain 1,000 draws from the joint posterior of (phi,Q) such that the 
% identified set is nonempty using the Gibbs sampler.
rng(19061987);
posteriorSamplerGibbs;
runTimeGibbs4 = runTime;

TT = table([runTimeGibbs1 runTimeAR1;
 runTimeGibbs2 runTimeAR2; 
 runTimeGibbs3 runTimeAR3;
 runTimeGibbs4 runTimeAR4])

cd(outputdir);
writetable(TT,'Results','FILETYPE','Spreadsheet','Sheet','drawtimes');

save('drawqAlgorithms_results.mat');
cd(oldFolder);
