# Supplementary material for: Algorithms for inference in SVARs identified with sign and zero restrictions
Source: Oxford University Press journal article supplement (doi:10.1093/ectj/utac009), 2022-02-16
Supplement: utac009_replication_package.zip [file utac009_replication_package.zip › mainfile_shockRank.m]

% Conduct (robust) posterior inference under shock-rank restriction.

clear variables
close all
clc

oldFolder = pwd;
addpath('auxFunctions');
outputdir = 'outputs';

%% Import data.
% These are obtained from the Matlab documentation accompanying Arias,
% Caldara and Rubio-Ramirez (2019), available on Jonas Arias' website:
% https://sites.google.com/site/jonasarias/.
% Variables are:
% 1: GDP (y)
% 2: GDP deflator (p)
% 3: Commodity prices (c)
% 4: Total reserves (tr)
% 5: Non-borrowed reserves (nbr)
% 6: Fed funds rate (r)
dataRaw = importdata('data_ACR.csv');

% Order variables in dataset so that zero restrictions apply to the first
% column of the orthonormal matrix.
data = dataRaw.data(:,[6, 1:5]); % (r y p c tr nbr)
data = [data(:,1) log(data(:,2:end))*100]; % Transform variables

% Extract date variable.
dates = datetime(dataRaw.textdata(2:end,1),'InputFormat','d/MM/yyyy');

% Declare any exogenous variables (other than the constant; leave empty 
% if none).
exog = [];

% Set variable names for plotting figures.
varnames = {'Federal Funds Rate','GDP','GDP Deflator',...
    'Commodity Prices','Total Reserves','Non-borrowed Reserves'};
% Set units for impulse responses. 0 = per cent, 1 = percentage points.
irfUnits = [1 0 0 0 0 0];

%% Options.
opt.p = 12; % No. of lags in VAR
opt.const = 1; % const = 1 if constant in VAR, = 0 otherwise
opt.ivar = [1 2 3 4 5 6];  % Indices of variables whose responses are of interest
opt.cumIR = []; % Indices of variables for which cumulative impulse response should be used
opt.H = 60; % Terminal horizon for impulse responses
opt.Kdraws = 1000; % No. of draws from posterior of phi (with nonempty identified set)
opt.aalpha = 0.68; % Credibility level for credible intervals
opt.maxDraw = 100000; % Maximum no. of draws from set of orthonormal matrices
opt.gridLength = 1000; % Size of grid used when computing credible intervals
opt.dispIter = 100; % Print number of draws remaining every dispIter draws
opt.L = 100; % Number of draws of q using Gibbs sampler
opt.burn = 3; % Drop first burn draws from Gibbs sampler
opt.f = 2; % Keep every w-th draw from Gibbs sampler

rng(19061987);

% Options for fmincon, which is used to compute the bounds of the
% identified set at each draw of phi.
optimOptions = optimoptions('fmincon');
optimOptions.Display = 'off'; % Do not display optimisation output
% Provide analytical gradient of objective function.
optimOptions.GradObj = 'on'; 
% Provide analytical gradient of nonlinear constraint.
optimOptions.SpecifyConstraintGradient = true; 
optimOptions.CheckGradients = false; % Check provided gradients numerically

%% Input equality and sign restrictions.
% Each row of eqRestr contains a vector (i,j,t) representing an equality 
% restriction, where t is the type of restriction:
% t = 1: the (ij)th element of A0 is zero
% t = 2: the (ij)th element of A0^(-1) is zero
% t = 3: the (ij)th element of the long-run cumulative impulse response 
% (LRCIR) is zero 
restr.eqRestr = ...
    [1 5 1; % A0_15 = 0 - fed funds rate does not respond to total reserves
     1 6 1]; % A0_16 = 0 - fed funds rate does not respond to non-borrowed reserves

% Each row of signRestr contains a vector (i,j,h,s,t) representing a sign 
% restriction, where t is the type of restriction:
% t = 1: the response of the ith variable with respect to the jth shock at 
% the hth horizon is nonnegative (s = 1) or nonpositive (s = -1).
% t = 2: the (ij)th element of A0 is nonnegative (s = 1) or nonpositive 
% (s = -1). 
% Note: do not include the sign normalisation in restr.signRestr.
restr.signRestr = ...
    [1 2 0 -1 2; % Response of fed funds rate to output is nonnegative
     1 3 0 -1 2; % Response of fed funds rate to prices is nonnegative
     1 1 0 1 1; % Response of r to monetary policy shock on impact is nonnegative
       1 1 1 1 1; % As above after one month
       1 1 2 1 1; % As above after two months
       1 1 3 1 1; % As above after three months
       1 1 4 1 1; % As above after four months
       1 1 5 1 1; % As above after five months
       3 1 0 -1 1; % Response of p to monetary policy shock is nonpositive
       3 1 1 -1 1; % As above after one month, etc
       3 1 2 -1 1;
       3 1 3 -1 1;
       3 1 4 -1 1;
       3 1 5 -1 1;
       4 1 0 -1 1; % Response of c to monetary policy shock is nonpositive
       4 1 1 -1 1; % As above after one month, etc
       4 1 2 -1 1;
       4 1 3 -1 1;
       4 1 4 -1 1;
       4 1 5 -1 1;       
       6 1 0 -1 1; % Response of nbr to monetary policy shock is nonpositive
       6 1 1 -1 1; % As above after one month, etc
       6 1 2 -1 1;
       6 1 3 -1 1;
       6 1 4 -1 1;
       6 1 5 -1 1];  

% shockRank contains a vector (t,k,s) representing the shock-rank 
% restriction. 
% If k = 0 and s = 1 (s = -1), the restriction is that the first shock in 
% period t was the largest positive (negative) realisation of the shock
% in the sample period.
% If k = 1 and s = 1 (s = -1), the restriction is that the first shock in 
% period t is positive (negative) and larger in magnitude than the first 
% shock in all other periods.
% restr.shockRank = []; % No shock-rank restriction
% Monetary policy shock in October 1979 is largest positive realisation of
% shock.
restr.shockRank = ...
    [find(dates == datetime({'1/10/1979'},'InputFormat','d/MM/yyyy')),0, 1];

%% Conduct robust posterior inference.
posteriorSamplerShockRank;

% Compute lower posterior probability that output response is negative at
% the two-year horizon.
mean(irfMax(:,25,2) < 0)

cd(outputdir);
save('results_shockRank.mat');

%% Plot impulse responses.
figure;
h1 = plot(0:opt.H,irfMeanlb(:,2),'color','black','LineStyle','--');
hold on;
plot(0:opt.H,irfMeanub(:,2),'color','black','LineStyle','--');
h2 = plot(0:opt.H,irfCredlb(:,2),'color','black','LineWidth',2);
plot(0:opt.H,irfCredub(:,2),'color','black','LineWidth',2);
line([0 opt.H],[0 0],'color','black','LineStyle',':');
for hh = 0:opt.H
    line([hh hh],[irfMeanlb(hh+1,2) irfMeanub(hh+1,2)],...
        'color','k');
end
xlabel('Horizon (months)');
ylabel('%');
title('Output');
ylim([-0.8, 0.8]);
legend([h1 h2],{'Set of posterior means','68% robust credible region'},...
    'Location','NorthWest');
legend boxoff;
Ax = gca;
Ax.FontSize = 14;
yticks(-0.8:0.4:0.8);
print('outputResponses_ShockRank','-depsc');
print('outputResponses_ShockRank','-dpng');

figure;
h1 = plot(0:opt.H,irfMeanlb(:,1),'color','black','LineStyle','--');
hold on;
plot(0:opt.H,irfMeanub(:,1),'color','black','LineStyle','--');
h2 = plot(0:opt.H,irfCredlb(:,1),'color','black','LineWidth',2);
plot(0:opt.H,irfCredub(:,1),'color','black','LineWidth',2);
line([0 opt.H],[0 0],'color','black','LineStyle',':');
for hh = 0:opt.H
    line([hh hh],[irfMeanlb(hh+1,1) irfMeanub(hh+1,1)],...
        'color','k');
end
xlabel('Horizon (months)');
ylabel('%');
title('Federal funds rate');
ylim([-0.4, 0.8]);
Ax = gca;
Ax.FontSize = 14;
yticks(-0.4:0.2:0.8);
print('ffrResponses_ShockRank','-depsc');

cd(oldFolder);
