# Supplementary material for: Algorithms for inference in SVARs identified with sign and zero restrictions
Source: Oxford University Press journal article supplement (doi:10.1093/ectj/utac009), 2022-02-16
Supplement: utac009_replication_package.zip [file utac009_replication_package.zip › Qgibbs.m]

% Check whether Algorithm 6.1 generates uniform draws over the space of
% orthonormal matrices satisfying the sign and zero restrictions using a
% simple numerical example.

clear variables
close all
clc

addpath('auxFunctions');

rng(23032021);

%% Specify DGP.
n = 4;
A0 = [1 0.8 0 -0.3;
      -0.2 1.1 0.6 0.5;
      0.64 0.9 0.9 -0.2;
      -0.3 0.6 0.5 1.3];
A0inv = A0\eye(4);
Sigma = A0inv*A0inv';
Sigmatr = chol(Sigma,'lower');
Sigmatrinv = Sigmatr\eye(4);
Q = Sigmatrinv*A0inv;

%% Construct matrices representing zero and sign restrictions.
F = Sigmatrinv(:,3)';
f = [1; 0];
S = zeros(6,4);
S(1,:) = Sigmatrinv(:,1)'; % Sign normalisation on q_1
S(2,:) = Sigmatr(1,:); % B(1,1) >= 0
S(3,:) = Sigmatr(2,:) ; % B(2,1) >= 0
S(4,:) = Sigmatrinv(:,2)'; % Sign normalisation on q_2
S(5,:) = -Sigmatr(1,:); % B(1,2) <= 0
S(6,:) = Sigmatr(2,:); % B(2,2) >= 0
s = [3; 3];

% Set up initial value of Q_{1:i*} satisfying restrictions (true value
% here). Here, i* = 2 (i.e. we only sample first two columns).
Q0 = Q(:,1:2);

%% Sample from identified set for Q using Gibbs sampler.
% Given input for Q_{1:i*} and zero restrictions, construct extended set of
% zero restrictions representing original zero restrictions plus
% orthogonality restrictions.

opt.L = 1;
opt.burn = 3;
opt.f = 1;

draws = 100000;

Qdraws = zeros(n,2,draws);
Bdraws = zeros(n,2,draws);
A0draws = zeros(2,n,draws);

tic

for kk = 1:draws

    for jj = 1:2

        Fext = [Q0(:,[1:(jj-1), (jj+1):end]),...
            F((sum(f(1:(jj-1)))+1):sum(f(1:jj)),:)']';
        rext = size(Fext,1);

        % Compute change-of-basis matrix.
        K = [null(Fext), null(null(Fext)')];

        % Apply change of basis to coefficient vectors in sign restrictions
        % on j-th column of Q. (Note K' = K^{-1})
        Stilde = (K'*S((sum(s(1:(jj-1)))+1):sum(s(1:jj)),:)')'; 

        % Project sign restrictions onto hyperplane generated by zero 
        % restrictions.
        b = [zeros(rext,n-rext), eye(rext)]';
        B = eye(n) - b*((b'*b)\b');
        Sbar = (B*Stilde')';

        Sbar = Sbar(:,1:(n-rext)); % Drop last r elements (which are zero)

        qbar = K'*Q0(:,jj);
        qbar = qbar(1:(n-rext));
        
        % Apply Algorithm 4.2 to sample from identified set for q_j given
        % zero, orthogonality and sign restrictions.
        q0 = drawqGibbs(Sbar,rext,K,qbar,opt);
        
        % Update Q0.
        Q0 = [Q0(:,1:(jj-1)), q0, Q0(:,(jj+1):end)];
        
        Qdraws(:,:,kk) = Q0;
        Bdraws(:,:,kk) = Sigmatr*Q0;
        A0draws(:,:,kk) = Q0'*Sigmatrinv;
        
    end

end

runTime = toc

%% Use rejection sampler to compare distributions.

S2 = zeros(4,2*n);
S2(1:2,1:n) = S(2:3,:);
S2(3:4,(n+1):end) = S(5:6,:);

Qdraws2 = zeros(n,2,draws);
Bdraws2 = zeros(n,2,draws);
A0draws2 = zeros(2,n,draws);

tic

parfor kk = 1:draws

    flag = 0;
    
    while flag == 0
        
        % Draw Q from space of orthonormal matrices satisfying equality 
        % restrictions.

        % Generate vector of standard normal random variables.
        z = randn(n,1); 

        Qtilde = zeros(n,2);

        % Find rows of F restricting first column of Q (F1).
        F1 = F(1:f(1),:);

        % Compute residual from linear projection of z on F1'.
        [q,r] = qr(F1',0);
        Qtilde(:,1) = z-F1'*(r \ (q'*z));

       % Find rows of F restricting 2nd column of Q (Fj).
       Fj = F((f(1)+1):sum(f),:);
       regMat = [Fj' Qtilde(:,1)];
       
       % Generate vector of independent standard normal random variables.
       z = randn(n,1); 

       % Compute residual from linear projection of z on regMat.
       [q,r] = qr(regMat,0);
       Qtilde(:,2) = z - regMat*(r \ (q'*z));

        % Normalise diagonal elements of A0 to be positive. Note that Matlab 
        % is implicitly expanding arrays to be compatible with elementwise 
        % array operations.
        Qhat = ((sign(diag(Sigmatrinv'*Qtilde))').*Qtilde)./vecnorm(Qtilde);

        % Check whether proposed draw satisfies sign restrictions (if any).
        if all(S2*Qhat(:) >=  0) % If draw satisfies sign restrictions

            flag = 1;
            Qdraws2(:,:,kk) = Qhat;
            Bdraws2(:,:,kk) = Sigmatr*Qhat;
            A0draws2(:,:,kk) = Qhat'*Sigmatrinv;

        end
        
                
        
    end

end

runTime2 = toc

figure;
histogram(Bdraws(2,1,:)); 
hold on
histogram(Bdraws2(2,1,:));

kstest2(squeeze(Bdraws(1,1,:)),squeeze(Bdraws2(1,1,:)))
