# Supplementary material for: Algorithms for inference in SVARs identified with sign and zero restrictions
Source: Oxford University Press journal article supplement (doi:10.1093/ectj/utac009), 2022-02-16
Supplement: utac009_replication_package.zip [file utac009_replication_package.zip › robustAlgorithms.m]

% Compare algorithms used to compute bounds of the identified set for
% impulse responses using model from Arias, Caldara and 
% Rubio-Ramirez (2019).

clear variables
close all
clc

oldFolder = pwd;
addpath('auxFunctions');
outputdir = 'outputs';
cd(outputdir);
load('checkEmptyISAlgorithms_results.mat');
cd(oldFolder);

opt.ivar = 2; % Index of variable of interest (output)
opt.aalpha = 0.68; % Credibility of robust credible intervals
opt.phiDraws = 1000; % Number of draws of phi with nonempty identified set
opt.gridLength = 1000; % Size of grid used when computing credible intervals

% Options for fmincon.
optimOptions = optimoptions('fmincon');
optimOptions.Display = 'off'; % Do not display optimisation output
% Provide analytical gradient of objective function.
optimOptions.GradObj = 'on'; 
% Provide analytical gradient of nonlinear constraint.
optimOptions.SpecifyConstraintGradient = true; 
optimOptions.CheckGradients = false; % Check provided gradients numerically

%% Identifying restrictions (1).
% Each row of signRestr contains a vector (i,j,h,s,t) representing a sign 
% restriction, where t is the type of restriction:
% t = 1: the response of the ith variable with respect to the jth shock at 
% the hth horizon is nonnegative (s = 1) or nonpositive (s = -1).
% t = 2: the (ij)th element of A0 is nonnegative (s = 1) or nonpositive 
% (s = -1). 
restr.signRestr = ...
     [1 2 0 -1 2; % Response of fed funds rate to output is nonnegative
      1 3 0 -1 2; % Response of fed funds rate to prices is nonnegative
      1 1 0 1 1]; % Impact response of fed funds rate to MPS is nonnegative
  
% Obtain 1,000 draws from the posterior of phi such that the 
% identified set is nonempty using the accept-reject algorithm and use
% these draws as initial values in an optimisation step to compute the
% bounds of the identified set.

% Use rejection sampler to check if identified set is nonempty and to
% obtain initial value for optimisation step.
rng(19061987);
robustBayesAR;
irfMin_1_RS = irfMin;
irfMax_1_RS = irfMax;
irfMeanlb_1_RS = irfMeanlb;
irfMeanub_1_RS = irfMeanub;
irfCredlb_1_RS = irfCredlb;
irfCredub_1_RS = irfCredub;
runTime_1_RS = runTime;

% Use Algorithm 4.1 to check if identified set is nonempty and to 
% obtain initial value for optimisation step.
rng(19061987);
robustBayesCheby;
irfMin_1_Cheby = irfMin;
irfMax_1_Cheby = irfMax;
irfMeanlb_1_Cheby = irfMeanlb;
irfMeanub_1_Cheby = irfMeanub;
irfCredlb_1_Cheby = irfCredlb;
irfCredub_1_Cheby = irfCredub;
runTime_1_Cheby = runTime;

% Use GKV20 algorithm to determine if identified set is nonempty and use
% approach from Gafarov, Meier and Montiel-Olea (2018) to compute bounds.
rng(19061987);
robustBayesActiveSet;
irfMin_1_AS = irfMin;
irfMax_1_AS = irfMax;
irfMeanlb_1_AS = irfMeanlb;
irfMeanub_1_AS = irfMeanub;
irfCredlb_1_AS = irfCredlb;
irfCredub_1_AS = irfCredub;
runTime_1_AS = runTime;

%% Add baseline sign restrictions from Uhlig (2005).
S1 = [1 1 0 1 1];
S1 = repmat(S1,[6,1]);
S1(:,3) = 0:5;
S2 = [3 1 0 -1 1];
S2 = repmat(S2,[6,1]);
S2(:,3) = 0:5;
S3 = [4 1 0 -1 1];
S3 = repmat(S3,[6,1]);
S3(:,3) = 0:5;
S4 = [6 1 0 -1 1];
S4 = repmat(S4,[6,1]);
S4(:,3) = 0:5;

restr.signRestr = ...
     [1 2 0 -1 2; % Response of fed funds rate to output is nonnegative
      1 3 0 -1 2; % Response of fed funds rate to prices is nonnegative
      S1; S2; S3; S4]; % Add extended sign restrictions from Uhlig (2005)

% Use rejection sampler to check if identified set is nonempty and to
% obtain initial value for optimisation step.
rng(19061987);
robustBayesAR;
irfMin_2_RS = irfMin;
irfMax_2_RS = irfMax;
irfMeanlb_2_RS = irfMeanlb;
irfMeanub_2_RS = irfMeanub;
irfCredlb_2_RS = irfCredlb;
irfCredub_2_RS = irfCredub;
runTime_2_RS = runTime;

% Use Algorithm 4.1 to check if identified set is nonempty and to 
% obtain initial value for optimisation step.
rng(19061987);
robustBayesCheby;
irfMin_2_Cheby = irfMin;
irfMax_2_Cheby = irfMax;
irfMeanlb_2_Cheby = irfMeanlb;
irfMeanub_2_Cheby = irfMeanub;
irfCredlb_2_Cheby = irfCredlb;
irfCredub_2_Cheby = irfCredub;
runTime_2_Cheby = runTime;

% Use GKV20 algorithm to determine if identified set is nonempty and use
% approach from Gafarov, Meier and Montiel-Olea (2018) to compute bounds.
rng(19061987);
robustBayesActiveSet;
irfMin_2_AS = irfMin;
irfMax_2_AS = irfMax;
irfMeanlb_2_AS = irfMeanlb;
irfMeanub_2_AS = irfMeanub;
irfCredlb_2_AS = irfCredlb;
irfCredub_2_AS = irfCredub;
runTime_2_AS = runTime;

%% Add extended sign restrictions from Uhlig (2005).
% Restrictions are as above but for one year after shock.
S1 = [1 1 0 1 1];
S1 = repmat(S1,[12,1]);
S1(:,3) = 0:11;
S2 = [3 1 0 -1 1];
S2 = repmat(S2,[12,1]);
S2(:,3) = 0:11;
S3 = [4 1 0 -1 1];
S3 = repmat(S3,[12,1]);
S3(:,3) = 0:11;
S4 = [6 1 0 -1 1];
S4 = repmat(S4,[12,1]);
S4(:,3) = 0:11;

restr.signRestr = ...
     [1 2 0 -1 2; % Response of fed funds rate to output is nonnegative
      1 3 0 -1 2; % Response of fed funds rate to prices is nonnegative
      S1; S2; S3; S4];

  % Use rejection sampler to check if identified set is nonempty and to
% obtain initial value for optimisation step.
rng(19061987);
robustBayesAR;
irfMin_3_RS = irfMin;
irfMax_3_RS = irfMax;
irfMeanlb_3_RS = irfMeanlb;
irfMeanub_3_RS = irfMeanub;
irfCredlb_3_RS = irfCredlb;
irfCredub_3_RS = irfCredub;
runTime_3_RS = runTime;

% Use Algorithm 4.1 to check if identified set is nonempty and to 
% obtain initial value for optimisation step.
rng(19061987);
robustBayesCheby;
irfMin_3_Cheby = irfMin;
irfMax_3_Cheby = irfMax;
irfMeanlb_3_Cheby = irfMeanlb;
irfMeanub_3_Cheby = irfMeanub;
irfCredlb_3_Cheby = irfCredlb;
irfCredub_3_Cheby = irfCredub;
runTime_3_Cheby = runTime;

% Use GKV20 algorithm to determine if identified set is nonempty and use
% approach from Gafarov, Meier and Montiel-Olea (2018) to compute bounds.
rng(19061987);
robustBayesActiveSet;
irfMin_3_AS = irfMin;
irfMax_3_AS = irfMax;
irfMeanlb_3_AS = irfMeanlb;
irfMeanub_3_AS = irfMeanub;
irfCredlb_3_AS = irfCredlb;
irfCredub_3_AS = irfCredub;
runTime_3_AS = runTime;

%% Add extended sign restrictions from Uhlig (2005).
% Restrictions are as above but for two years after shock.
S1 = [1 1 0 1 1];
S1 = repmat(S1,[24,1]);
S1(:,3) = 0:23;
S2 = [3 1 0 -1 1];
S2 = repmat(S2,[24,1]);
S2(:,3) = 0:23;
S3 = [4 1 0 -1 1];
S3 = repmat(S3,[24,1]);
S3(:,3) = 0:23;
S4 = [6 1 0 -1 1];
S4 = repmat(S4,[24,1]);
S4(:,3) = 0:23;

restr.signRestr = ...
     [1 2 0 -1 2; % Response of fed funds rate to output is nonnegative
      1 3 0 -1 2; % Response of fed funds rate to prices is nonnegative
      S1; S2; S3; S4];

  % Use rejection sampler to check if identified set is nonempty and to
% obtain initial value for optimisation step.
rng(19061987);
robustBayesAR;
irfMin_4_RS = irfMin;
irfMax_4_RS = irfMax;
irfMeanlb_4_RS = irfMeanlb;
irfMeanub_4_RS = irfMeanub;
irfCredlb_4_RS = irfCredlb;
irfCredub_4_RS = irfCredub;
runTime_4_RS = runTime;

% Use Algorithm 4.1 to check if identified set is nonempty and to 
% obtain initial value for optimisation step.
rng(19061987);
robustBayesCheby;
irfMin_4_Cheby = irfMin;
irfMax_4_Cheby = irfMax;
irfMeanlb_4_Cheby = irfMeanlb;
irfMeanub_4_Cheby = irfMeanub;
irfCredlb_4_Cheby = irfCredlb;
irfCredub_4_Cheby = irfCredub;
runTime_4_Cheby = runTime;

% Use GKV20 algorithm to determine if identified set is nonempty and use
% approach from Gafarov, Meier and Montiel-Olea (2018) to compute bounds.
rng(19061987);
robustBayesActiveSet;
irfMin_4_AS = irfMin;
irfMax_4_AS = irfMax;
irfMeanlb_4_AS = irfMeanlb;
irfMeanub_4_AS = irfMeanub;
irfCredlb_4_AS = irfCredlb;
irfCredub_4_AS = irfCredub;
runTime_4_AS = runTime;

runTimeTable = table([runTime_1_Cheby runTime_1_RS runTime_1_AS;
   runTime_2_Cheby runTime_2_RS runTime_2_AS; 
   runTime_3_Cheby runTime_3_RS runTime_3_AS;
   runTime_4_Cheby runTime_4_RS runTime_4_AS])

cd(outputdir);

writetable(runTimeTable,'Results','FILETYPE','Spreadsheet','Sheet','boundtimes');

save('robustAlgorithms_results.mat'); 

%% Plot set of posterior means and robust credible intervals.

figure;
h1 = plot(0:opt.H,irfMeanlb_1_Cheby,'color','black','LineStyle','--');
hold on;
plot(0:opt.H,irfMeanub_1_Cheby,'color','black','LineStyle','--');
h2 = plot(0:opt.H,irfCredlb_1_Cheby,'color','black','LineWidth',2);
plot(0:opt.H,irfCredub_1_Cheby,'color','black','LineWidth',2);
line([0 opt.H],[0 0],'color','black','LineStyle',':');
for hh = 0:opt.H
    line([hh hh],[irfMeanlb_1_Cheby(hh+1) irfMeanub_1_Cheby(hh+1)],...
        'color','k');
end
xlabel('Horizon (months)');
ylabel('%');
title('Restrictions (1)');
ylims = ylim;
Ax = gca;
Ax.FontSize = 14;
yticks(-0.8:0.4:0.8);
ylim(ylims);
print('outputResponses_1','-depsc');
print('outputResponses_1','-dpng');

figure;
h1 = plot(0:opt.H,irfMeanlb_2_Cheby,'color','black','LineStyle','--');
hold on;
plot(0:opt.H,irfMeanub_2_Cheby,'color','black','LineStyle','--');
h2 = plot(0:opt.H,irfCredlb_2_Cheby,'color','black','LineWidth',2);
plot(0:opt.H,irfCredub_2_Cheby,'color','black','LineWidth',2);
line([0 opt.H],[0 0],'color','black','LineStyle',':');
for hh = 0:opt.H
    line([hh hh],[irfMeanlb_2_Cheby(hh+1) irfMeanub_2_Cheby(hh+1)],...
        'color','k');
end
xlabel('Horizon (months)');
ylabel('%');
title('Restrictions (2)');
ylim(ylims);
Ax = gca;
Ax.FontSize = 14;
yticks(-0.8:0.4:0.8);
print('outputResponses_2','-depsc');
print('outputResponses_2','-dpng');

figure;
h1 = plot(0:opt.H,irfMeanlb_3_Cheby,'color','black','LineStyle','--');
hold on;
plot(0:opt.H,irfMeanub_3_Cheby,'color','black','LineStyle','--');
h2 = plot(0:opt.H,irfCredlb_3_Cheby,'color','black','LineWidth',2);
plot(0:opt.H,irfCredub_3_Cheby,'color','black','LineWidth',2);
line([0 opt.H],[0 0],'color','black','LineStyle',':');
for hh = 0:opt.H
    line([hh hh],[irfMeanlb_3_Cheby(hh+1) irfMeanub_3_Cheby(hh+1)],...
        'color','k');
end
xlabel('Horizon (months)');
ylabel('%');
title('Restrictions (3)');
ylim(ylims);
Ax = gca;
Ax.FontSize = 14;
yticks(-0.8:0.4:0.8);
print('outputResponses_3','-depsc');
print('outputResponses_3','-dpng');

figure;
h1 = plot(0:opt.H,irfMeanlb_4_Cheby,'color','black','LineStyle','--');
hold on;
plot(0:opt.H,irfMeanub_4_Cheby,'color','black','LineStyle','--');
h2 = plot(0:opt.H,irfCredlb_4_Cheby,'color','black','LineWidth',2);
plot(0:opt.H,irfCredub_4_Cheby,'color','black','LineWidth',2);
line([0 opt.H],[0 0],'color','black','LineStyle',':');
for hh = 0:opt.H
    line([hh hh],[irfMeanlb_4_Cheby(hh+1) irfMeanub_4_Cheby(hh+1)],...
        'color','k');
end
xlabel('Horizon (months)');
ylabel('%');
title('Restrictions (4)');
ylim(ylims);
legend([h1 h2],{'Set of posterior means','68% robust credible region'},...
    'Location','NorthWest');
legend boxoff;
Ax = gca;
Ax.FontSize = 14;
yticks(-0.8:0.4:0.8);
print('outputResponses_4','-depsc');
print('outputResponses_4','-dpng');

cd(oldFolder);
