# Supplementary material for: Algorithms for inference in SVARs identified with sign and zero restrictions
Source: Oxford University Press journal article supplement (doi:10.1093/ectj/utac009), 2022-02-16
Supplement: utac009_replication_package.zip [file utac009_replication_package.zip › runall.m]

% Compute posterior probability that identified set is empty under
% different sets of restrictions. Generates results in Table 1.
checkEmptyISAlgorithms

% Draw q_1 from a uniform distribution over space of orthonormal matrices
% satisfying identifying restrictions. Generates results in Figure 1 and
% first columns of Table 2.
drawqAlgorithms

% Compute bounds of identified set. Generates results in last columns of
% Table 2 and plots in Figure 2.
robustAlgorithms


tic
% Computes plots in Figure 3.
mainfile_shockRank
toc

% All outputs are saved to the `outputs' folder.
